# Supplementary material
Source: PubMed Central journal article supplement (PMC3879607)
Supplement: supp_M113.028647_mcp.M113.028647-1.pdf [file supp_M113.028647_mcp.M113.028647-1.pdf]

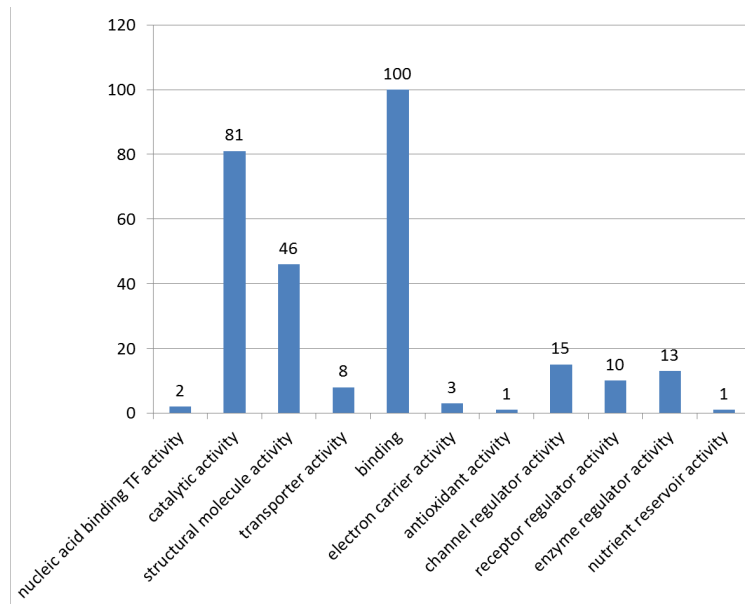

Figure S1. Go annotation on molecular functions of small peptides identified in the cDNA library of *C. flavidus* venom duct.

```

          10      20      30
    .....|.....|.....|.....|.....|.....|...
A  MGMGMRMM-FTVELLVVLATTVVSFTSGG-----
B  ---MHLY-TYLYLLVPLVTFHLILGTGTLDHGGALT
C  ---MQTA-YWVMVMMVVGITA-PLSEG-----
D  ---MPKLE-MMLLVLLLILPLSYFDAAG-----
I1 -MVIMKLC-LTFLLLIMI----LPLVTGG-----
I2 --MMFRLTSVSCFLLIVIVCLNLVVLVNA-----
I3 ---MKLV-LAIVLLIML----LSLSTGA-----
J  -MPSVRSVTCCCLWMMLSVQLVTPGSP-----
K  --MIMRMT-LTFLVLVVM--TAAS-ASG-----
L  --MNVTVM-FLVLLLLTM----PLTDG-----
M  MMSKLGVL-MLFIFLVLFPLAT-LQLDA-----
O1 ---MMKLT-CVLIVAVLFLT-ACQLITADDSA-----
O2 ---MEKLT-ILLLVAAVLMS-TQALVQS-----
O3 -MSGLGIM-VLTLLLLLFMATS-HQDGG-----
P  MHLSLARS-AVLLLLLLFALGNFAVVQS-----
S  MMLKMG---AMFVLLLLFTL---ASSQQ-----
T  ---MRCL-PVFILLLLLIASA-PSVDA-----
V  -----MM-PVLLLLLSLAIR-GGDG-----
Y  ---MQKA-TVLLLLLLLL---LPLSTA-----
Q  ---MHTLE-MLLLLLLLLLPL---APG-----

```

Figure S2. Alignment of consensus signal peptide sequences of different superfamilies. The consensus sequences were composed by most frequently appeared amino acid residues in each position.

SEQ: CCSDPPCRHKHQDLC, Carb(C1) Carb(C2) Carb(C7) Carb(C15) Amidation (C-term), Charge:3, MH+: 1968.7996, Score: 4.03e-011

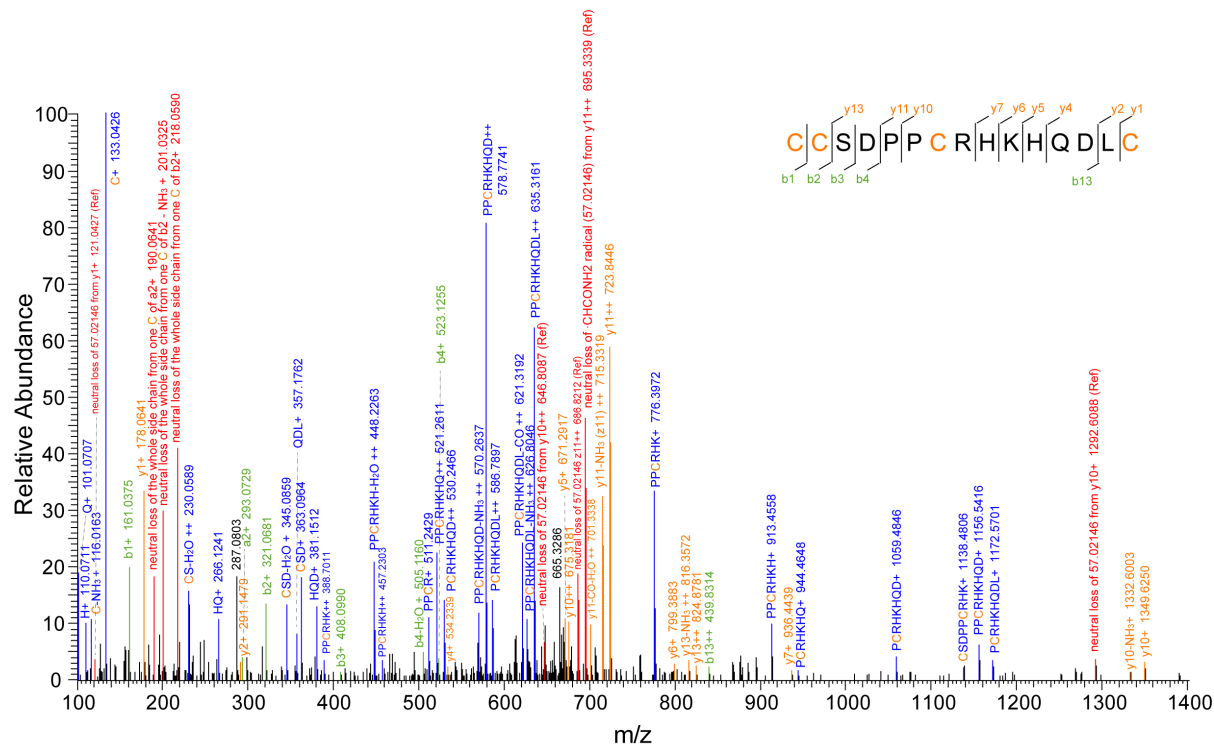

Figure S3. MS/MS spectrum of fla1a, CCSDPPCRHKHQDLC (C-term amidation). The red peaks are speculated assignments with neutral loss of iodoacetamide radical (CHCONH<sub>2</sub>, 57.02146) from the side chain of C-terminal iodoacetamide cysteine, which was reported previously by reference: Asakawa D, Smargiasso N, Quinton L, De Pauw E. (2013) Peptide backbone fragmentation initiated by side-chain loss at cysteine residue in matrix-assisted laser desorption/ionization in-source decay mass spectrometry. *J Mass Spectrom.* 48(3): 352-360.

SEQ: GCCSDPPCRHKHQDLC, Carb(C2) Carb (C3) Carb(C8) Carb (C16) Amidation (C-term), Charge:3, MH+: 2025.8185, Score: 3.92e-011

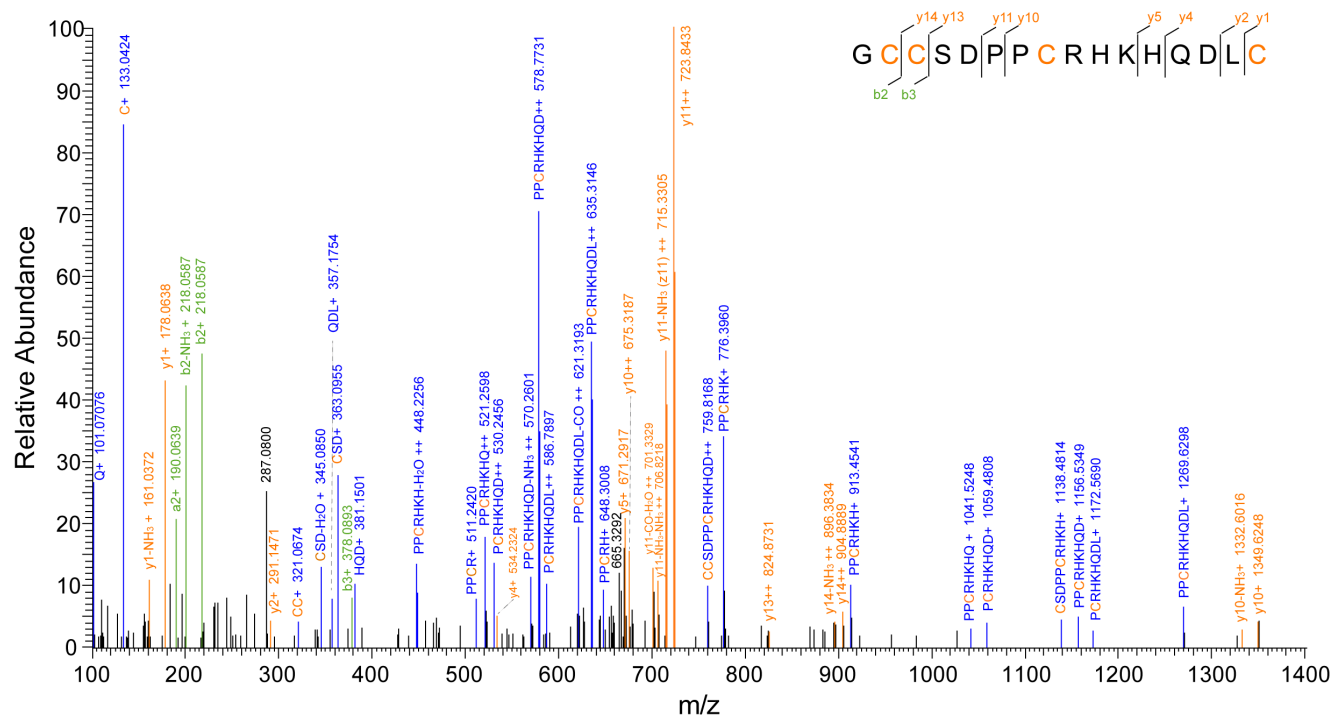

Figure S4. MS/MS spectrum of fla1b, GCCSDPPCRHKHQDLC (C-term amidation).



SEQ: ACNPPCSDILTCLHGTCCKHLGI, Carb(C2) Carb(C6) Carb(C12) Carb(C17) Amidation (C-term), Charge:4, MH+: 2523.1657, Score: 8.90e-043

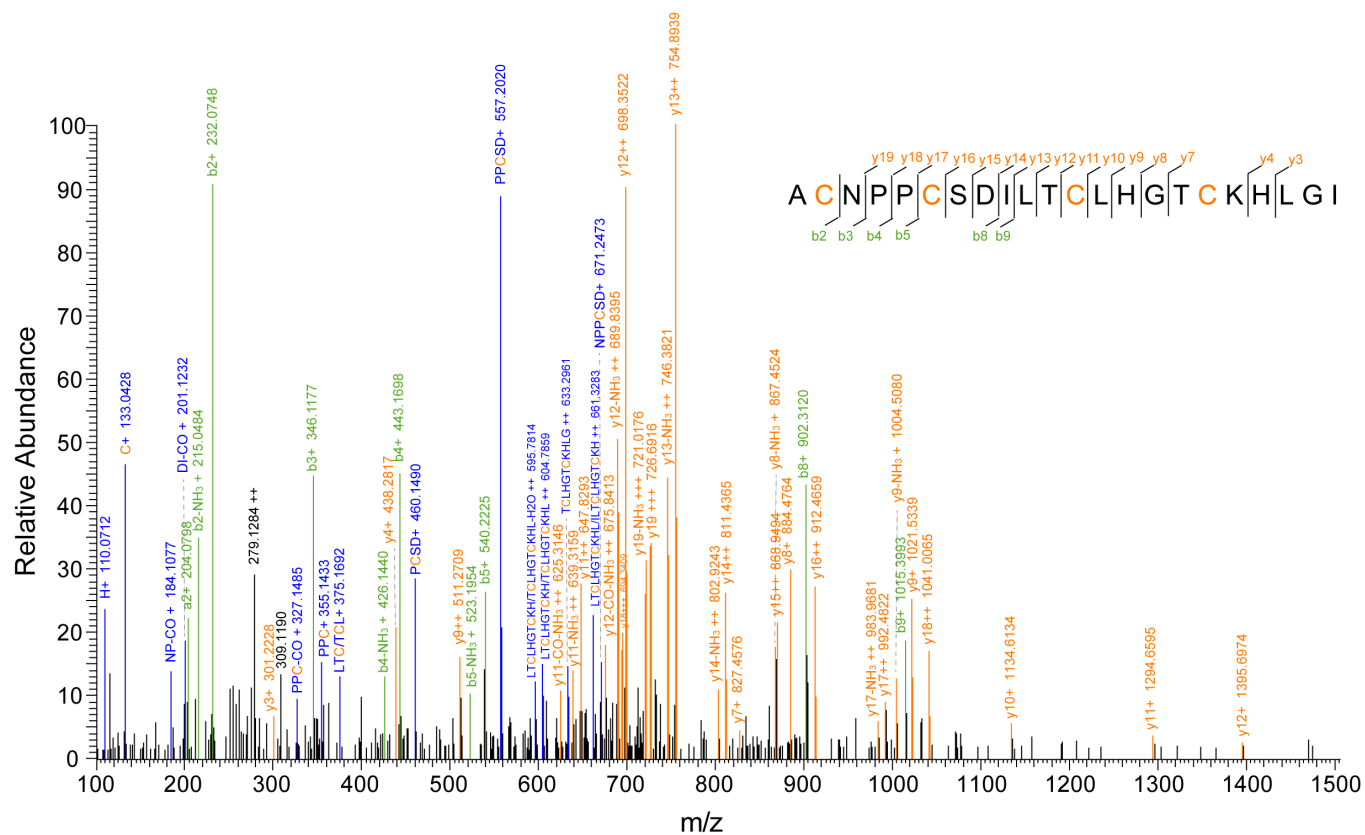

Figure S5. MS/MS spectrum of fla14a, ACNPPCSDILTCLHGTCCKHLGI (C-term amidation).

SEQ: ACNPPCSDILTCLHGTCCKHLGI, Carb(C2) Hydroxylation (P5) Carb (C6) Carb(C12) Carb (C17) Amidation (C-term), Charge:4, MH+: 2539.1588, Score: 1.82e-042

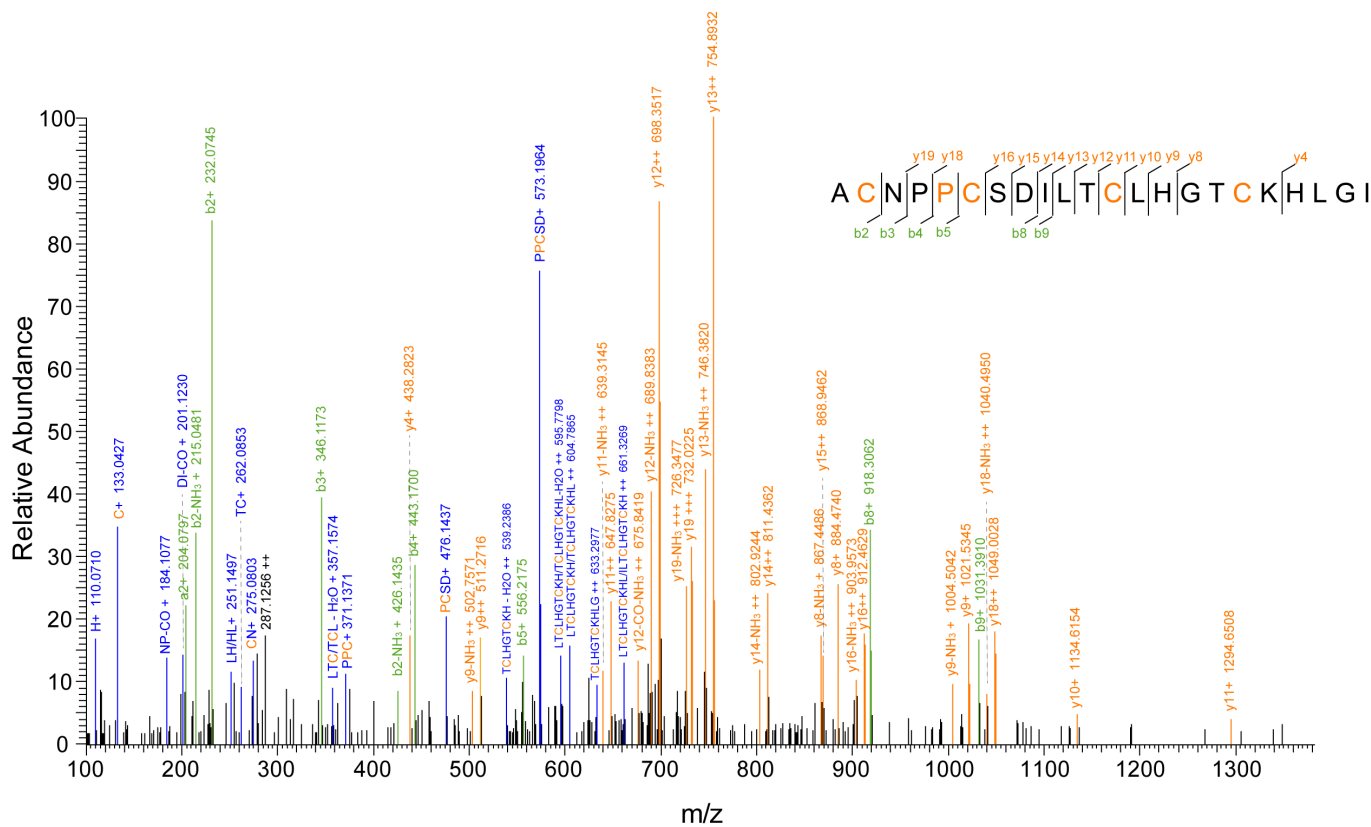

Figure S6. MS/MS spectrum of fla14b, ACNPPCSDILTCLHGTCCKHLGI (hydro(P5), C-term amidation), orange “P” indicates P with hydroxylation.

SEQ: ACNPPCSDILTCLHGTCCKHLGI, Carb(C2) Hydroxylation (P4) Hydroxylation (P5) Carb (C6) Carb(C12) Carb (C17) Amidation (C-term), Charge:4, MH+: 2523.1657, Score: 8.90e-043

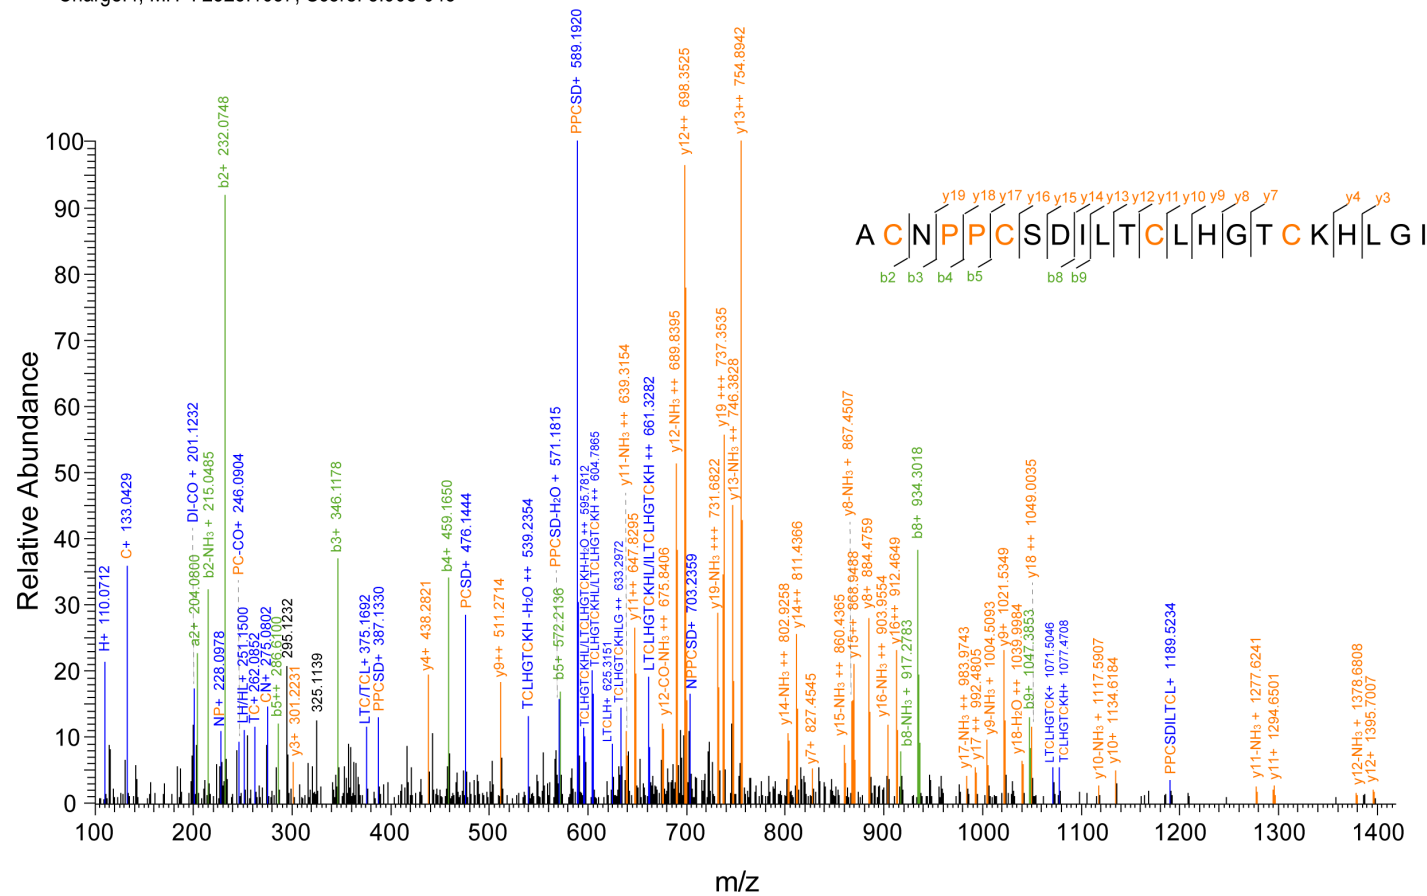

Figure S7. MS/MS spectrum of fla14c, ACNPPCSDILTCLHGTCCKHLGI (hydro(P4, P5), C-term amidation), orange “P” indicates P with hydroxylation.

SEQ: TCYPPCIGYTYCKSGTCEYRQ, Carb(C2) Carb(C6) Carb(C12) Carb(C17) Amidation (C-term), Charge:3, MH+: 2663.1040, Score: 1.56e-051

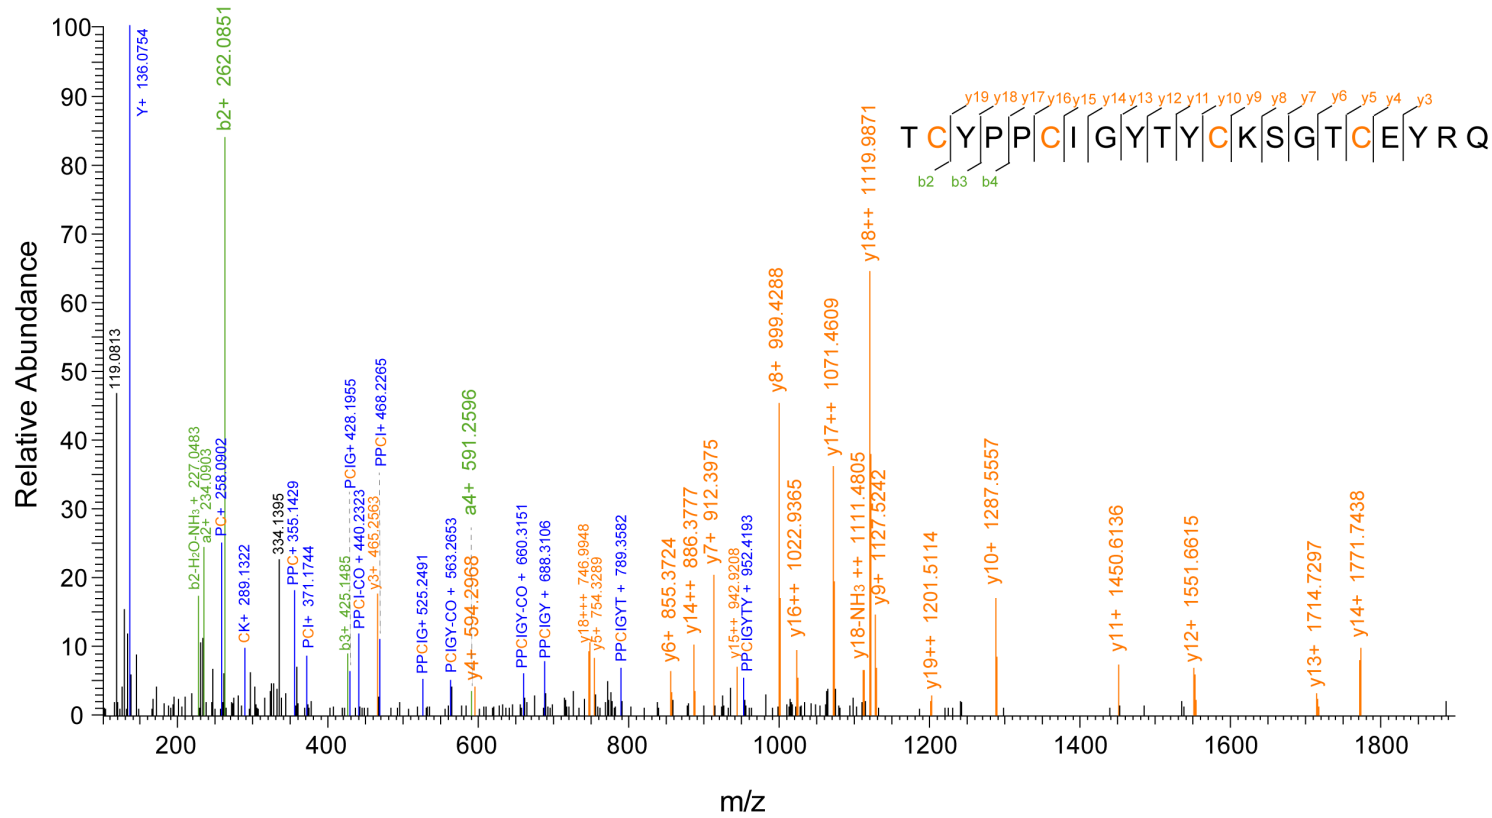

Figure S8. MS/MS spectrum of fla14d, TCYPPCIGYTYCKSGTCEYRQ (C-term amidation).

SEQ: CCSKYCWECTPCCPYSS, Carb(C1) Carb (C2) Carb(C6) Carb (C9) Hydrxoylation(P11) Carb(C12) Carb (C13) Amidation (C-term), Charge:2, MH+: 2319.7952, Score: 2.28e-022

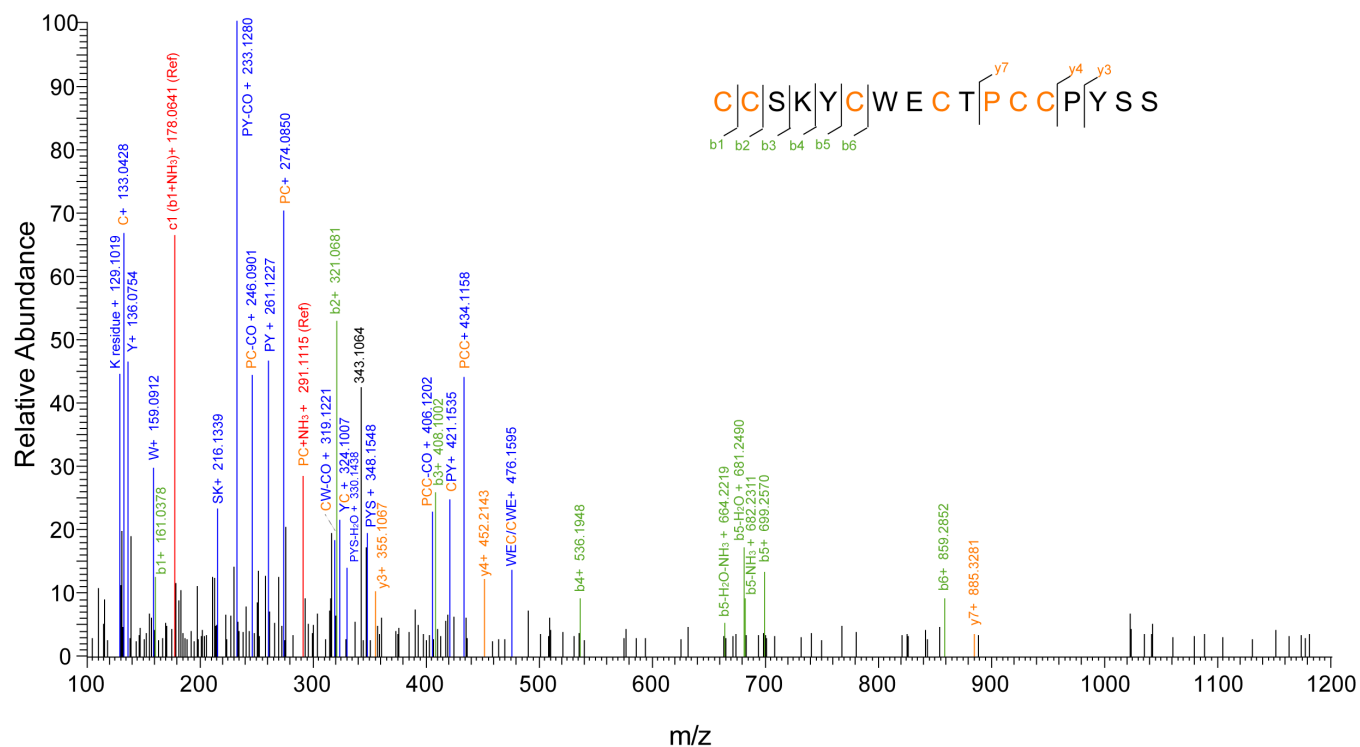

Figure S9. MS/MS spectrum of fla3a, CCSKYCWECTPCCPYSS (hydro(P11), C-term amidation), orange “P” indicates P with hydroxylation. The red peaks are speculated assignments to the breakdown of N-Cα of cysteine residue, which was reported previously by reference: Asakawa D, Smargiasso N, Quinton L, De Pauw E. (2013) Peptide backbone fragmentation initiated by side-chain loss at cysteine residue in matrix-assisted laser desorption/ionization in-source decay mass spectrometry. *J Mass Spectrom.* 48(3): 352-360.

SEQ: RCCLWPACWGCVCY, Carb(C2) Carb(C3) Carb(C8) Carb(C11) Carb(C13) Carb(C14), Charge:2, MH+: 2107.7830, Score: 6.19e-026

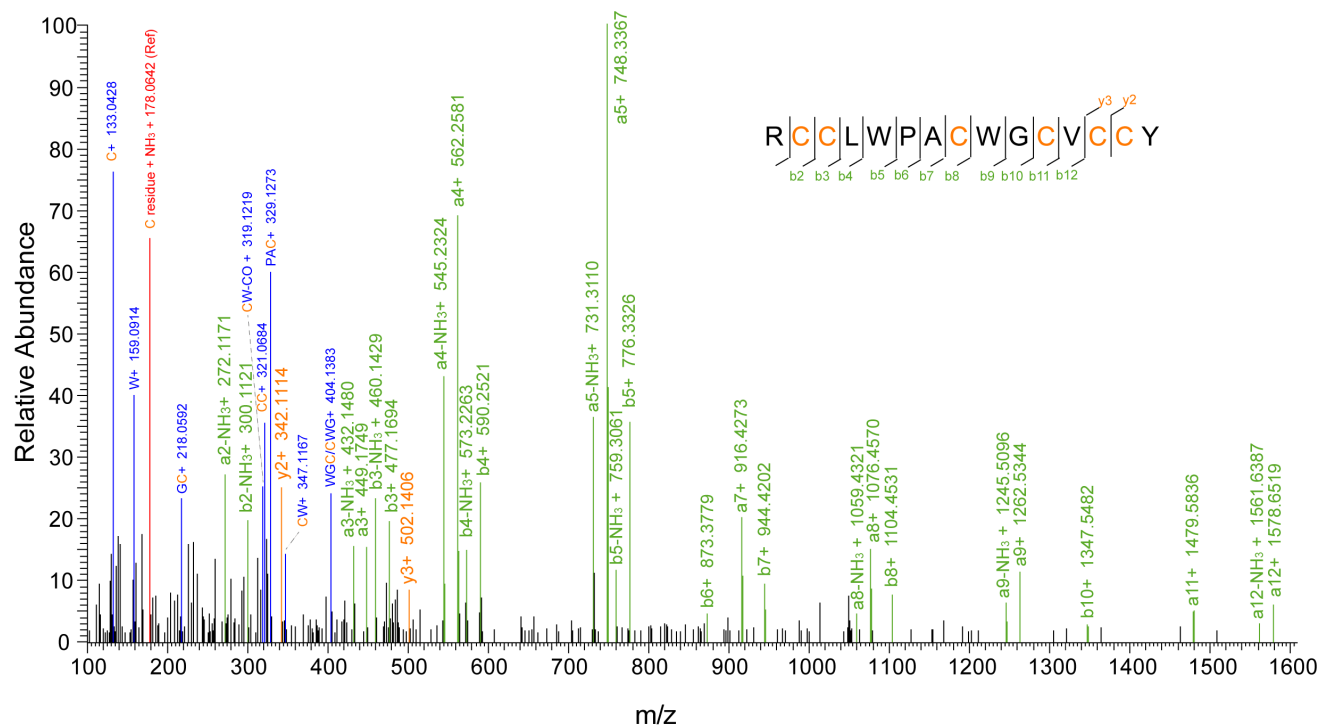

Figure S10. MS/MS spectrum of fla3b, RCCLWPACWGCVCY. The red peak is speculated assignment to the breakdown of N-Cα of cysteine residue, which was reported previously by reference: Asakawa D, Smargiasso N, Quinton L, De Pauw E. (2013) Peptide backbone fragmentation initiated by side-chain loss at cysteine residue in matrix-assisted laser desorption/ionization in-source decay mass spectrometry. *J Mass Spectrom.* 48(3): 352-360.

SEQ: RCCLWPECGGCVCY, Carb(C2) Carb(C3) Carb(C8) Carb(C11) Carb(C13) Carb(C14), Charge:2, MH+: 2036.7292, Score: 3.91e-024

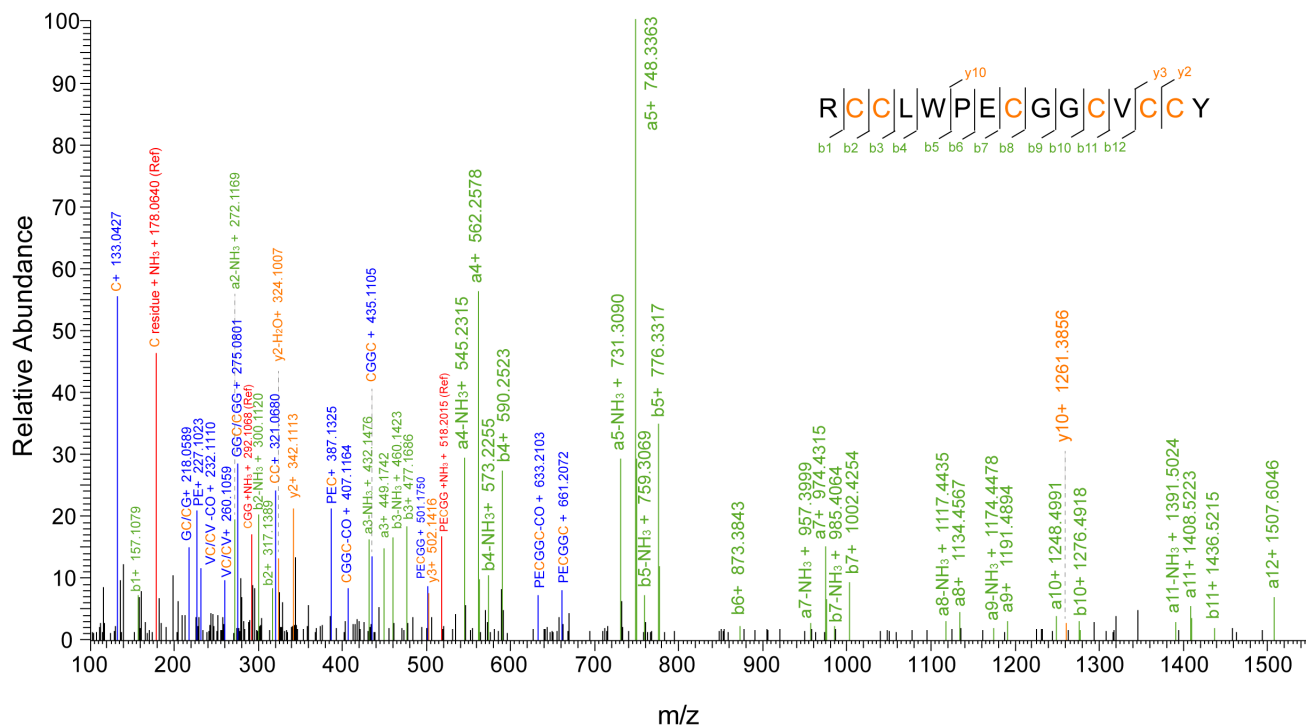

Figure S11. MS/MS spectrum of fla3c, RCCLWPECGGCVCY. The red indicated peaks are speculated assignments to the breakdown of N-C $\alpha$  of cysteine residue, which was reported previously by reference: Asakawa D, Smargiasso N, Quinton L, De Pauw E. (2013) Peptide backbone fragmentation initiated by side-chain loss at cysteine residue in matrix-assisted laser desorption/ionization in-source decay mass spectrometry. J Mass Spectrom. 48(3): 352-360.

SEQ: RCCLWPEGGCVCCY, Carb(C2) Carb (C3) Gala (E7) Carb(C8) Carb (C11) Carb(C13) Carb (C14), Charge:2, MH+: 2080.7210, Score: 5.38e-016

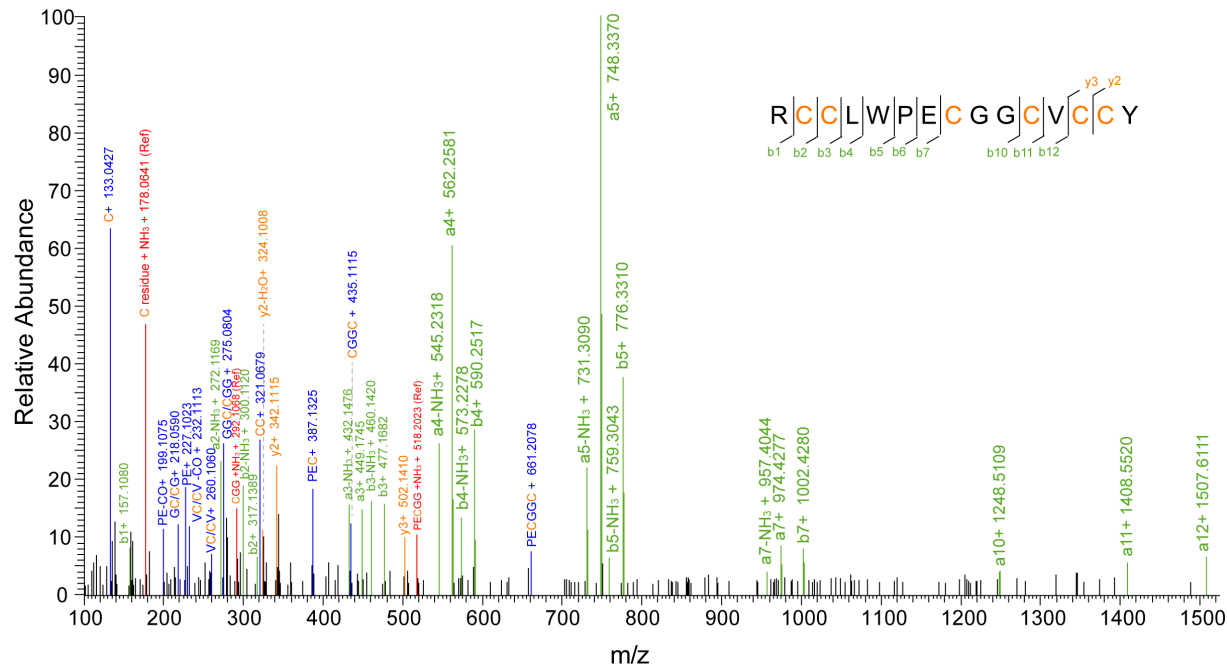

Figure S12. MS/MS spectrum of fla3d, RCCLWPEGGCVCCY (Gla(E7)). The red peaks are speculated assignments to the breakdown of N-C $\alpha$  of cysteine residue, which was reported previously by reference: Asakawa D, Smargiasso N, Quinton L, De Pauw E. (2013) Peptide backbone fragmentation initiated by side-chain loss at cysteine residue in matrix-assisted laser desorption/ionization in-source decay mass spectrometry. *J Mass Spectrom.* 48(3): 352-360.



SEQ: EWTFDFRPW, Amidation (C-term), Charge:2, MH+: 1135.5289, Score: 1.77e-013

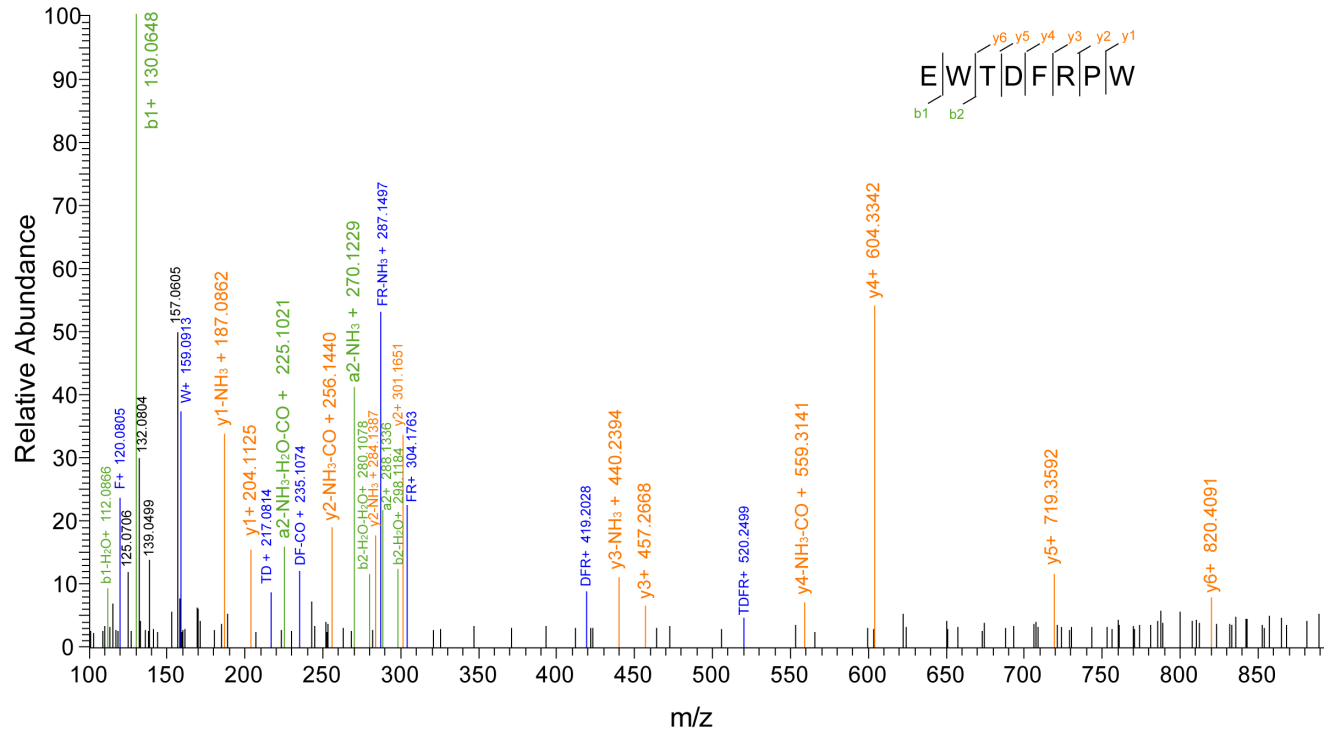

Figure S13. MS/MS spectrum of fla01, EWTFDFRPW (C-term amidation).

SEQ: EWTDFRPW, Gala(E1) Amidation (C-term), Charge:2, MH+: 1179.5192, Score: 3.18e-018

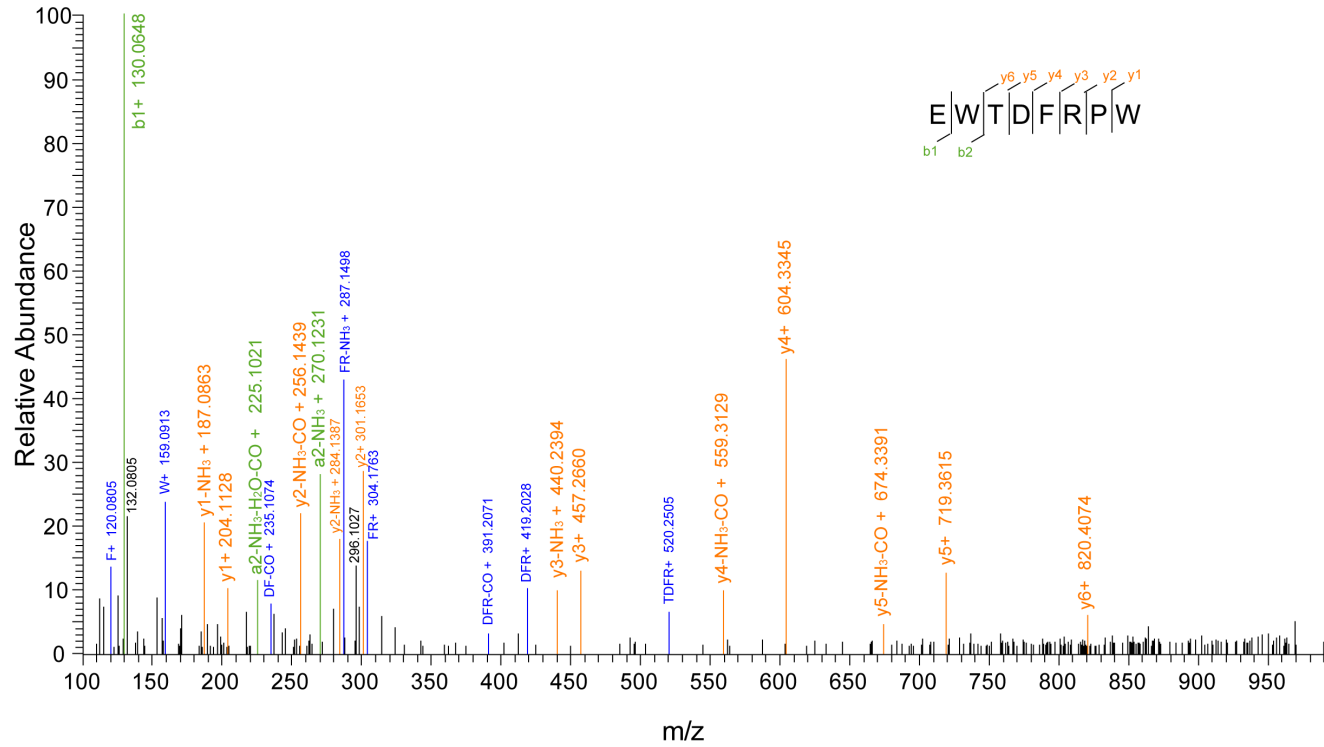

Figure S14. MS/MS spectrum of fla02, EWTDFRPW (Gla(E1), C-term amidation). There is a neutral loss of CO<sub>2</sub> from gamma carboxyglutamic acid Gla1.

SEQ: GGLGHAGGWVKAGALG, Charge:3, MH+: 1407.7446, Score: 4.46e-015

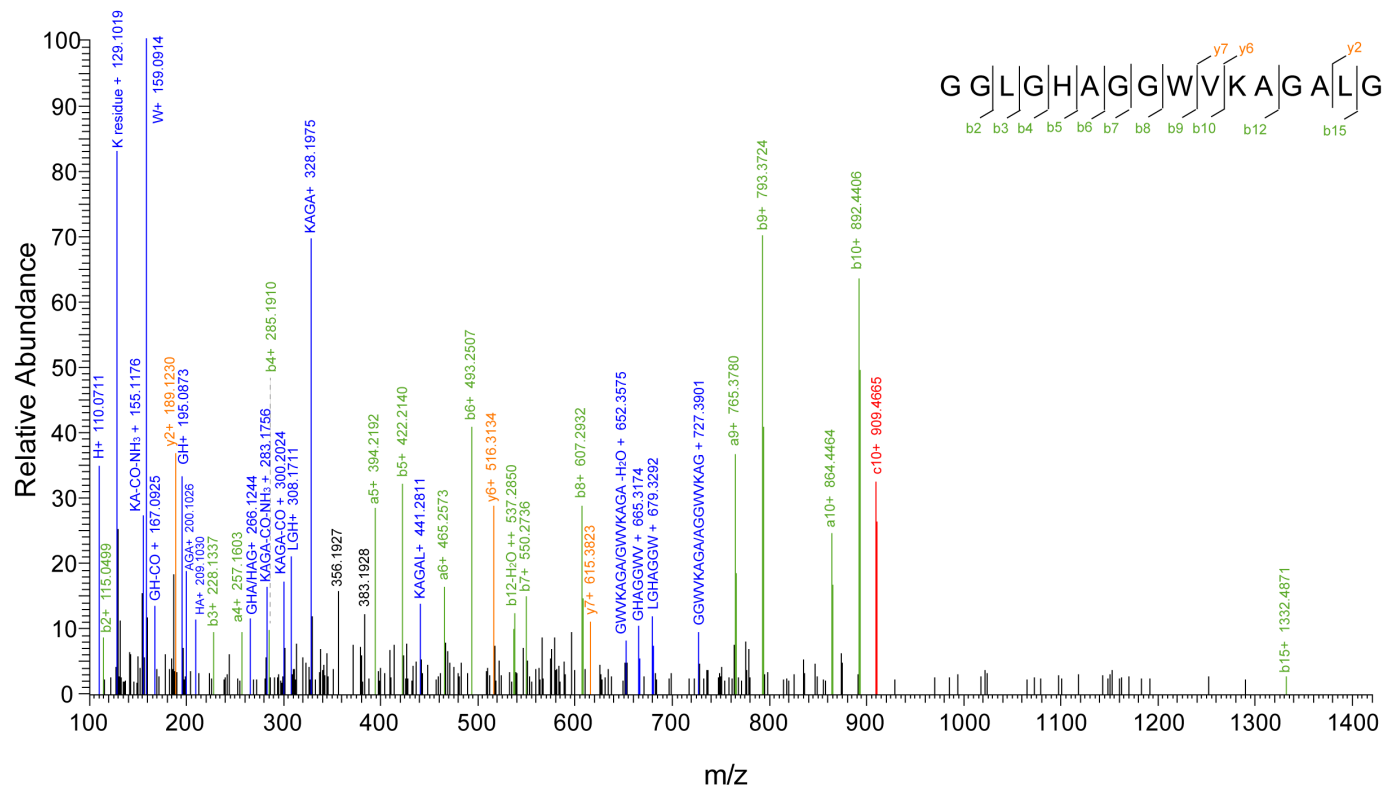

Figure S15. MS/MS spectrum of fla03, GGLGHAGGWVKAGALG. The c ion formation in CID experiment was previously reported by reference: Farrugia JM, O'Hair RAJ, Reid GE (2001). Do all b2 ions have oxazolone structures? Multistage mass spectrometry and ab initio studies on protonated N-acyl amino acid methyl ester model systems. *Int. J. Mass Spectrom.* 210, 71-87.

SEQ: GGLGHAGGWVKAGALGKDPGW, Amidation (C-term), Charge:3, MH+: 1990.0303, Score: 3.48e-017

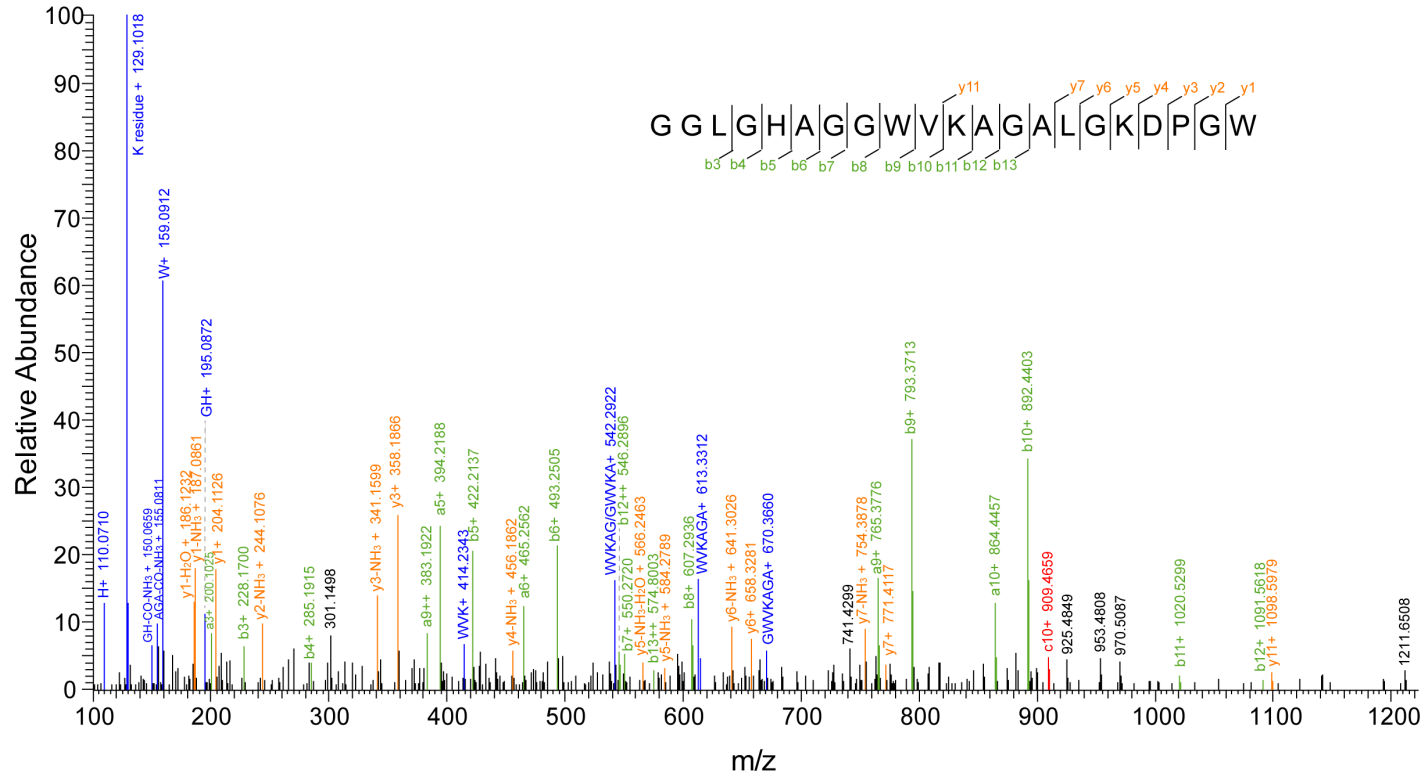

Figure S16. MS/MS spectrum of fla04, GGLGHAGGWVKAGALGKDPGW (C-term amidation). The c ion formation in CID experiment was previously reported by reference: Farrugia JM, O'Hair RAJ, Reid GE (2001). Do all b2 ions have oxazolone structures? Multistage mass spectrometry and ab initio studies on protonated N-acyl amino acid methyl ester model systems. *Int. J. Mass Spectrom.* 210, 71-87.

SEQ: GGLGHAGGWVKAGALGKDPGW, Charge:4, MH+: 1991.0250, Score: 1.99E-026

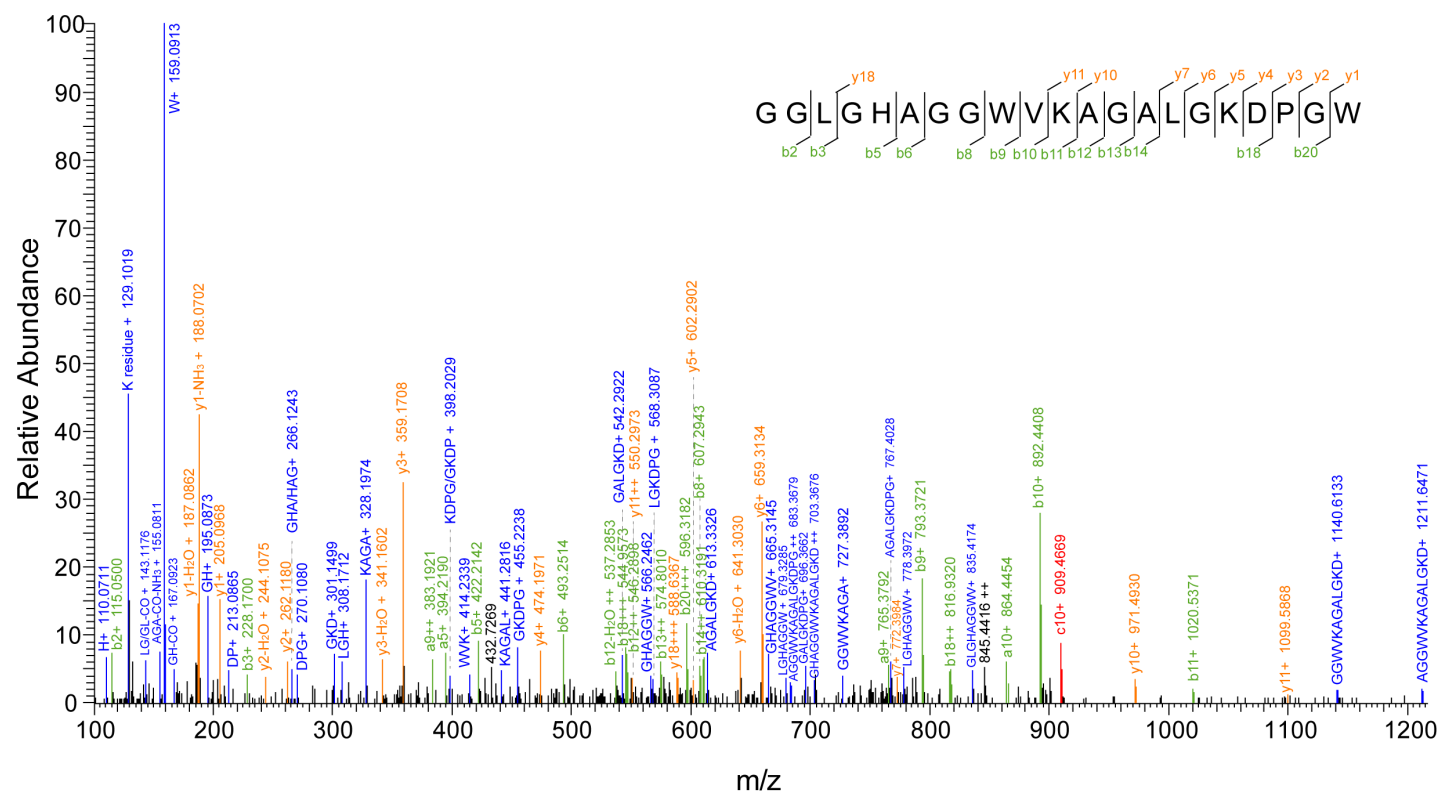

Figure S17. MS/MS spectrum of fla05, GGLGHAGGWVKAGALGKDPGW. The c ion formation in CID experiment was previously reported by reference: Farrugia JM, O’Hair RAJ, Reid GE (2001). Do all b2 ions have oxazolone structures? Multistage mass spectrometry and ab initio studies on protonated N-acyl amino acid methyl ester model systems. *Int. J. Mass Spectrom.* 210, 71-87.

SEQ: LGHAGGWVKAGALGKDPGW, Amidation (C-term), Charge:4, MH+: 1875.9901, Score: 5.49e-012

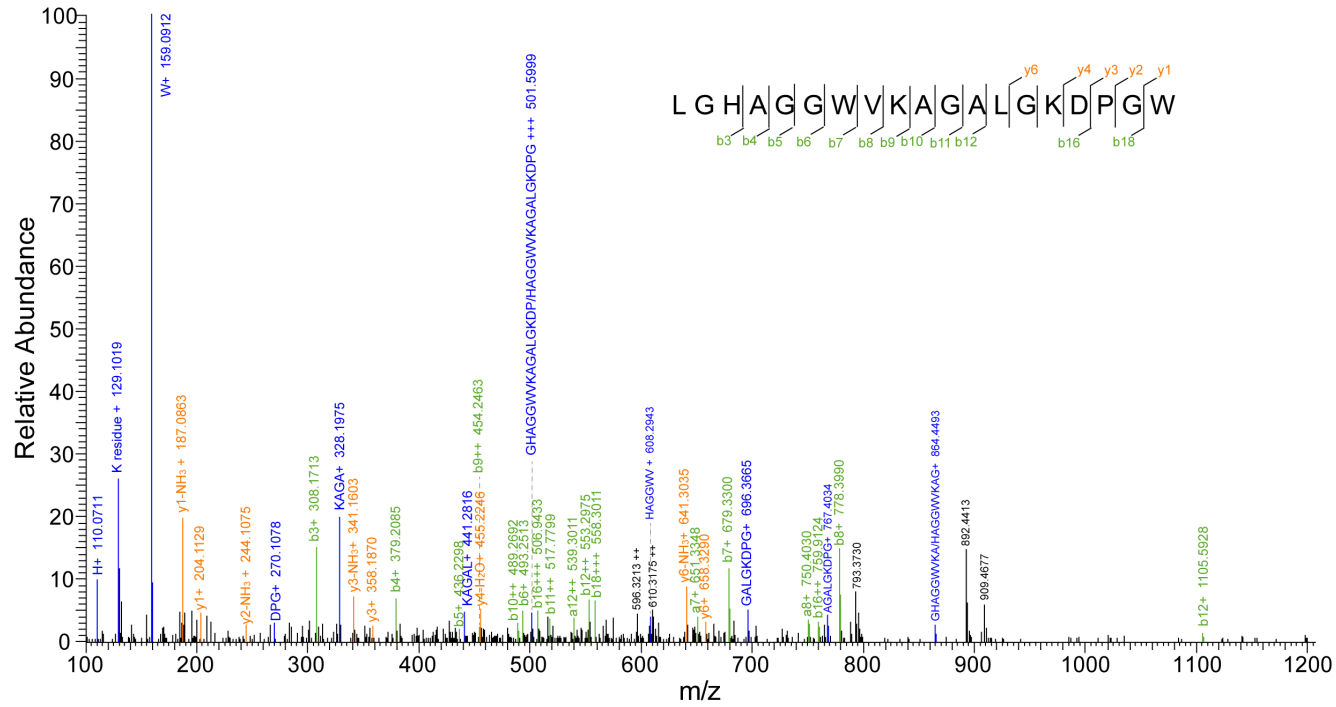

Figure S18. MS/MS spectrum of fla06, LGHAGGWVKAGALGKDPGW (C-term amidation).

SEQ: HAGGWVKAGALGKDPGW, Amidation (C-term), Charge:3, MH+: 1705.8867, Score: 7.44e-020

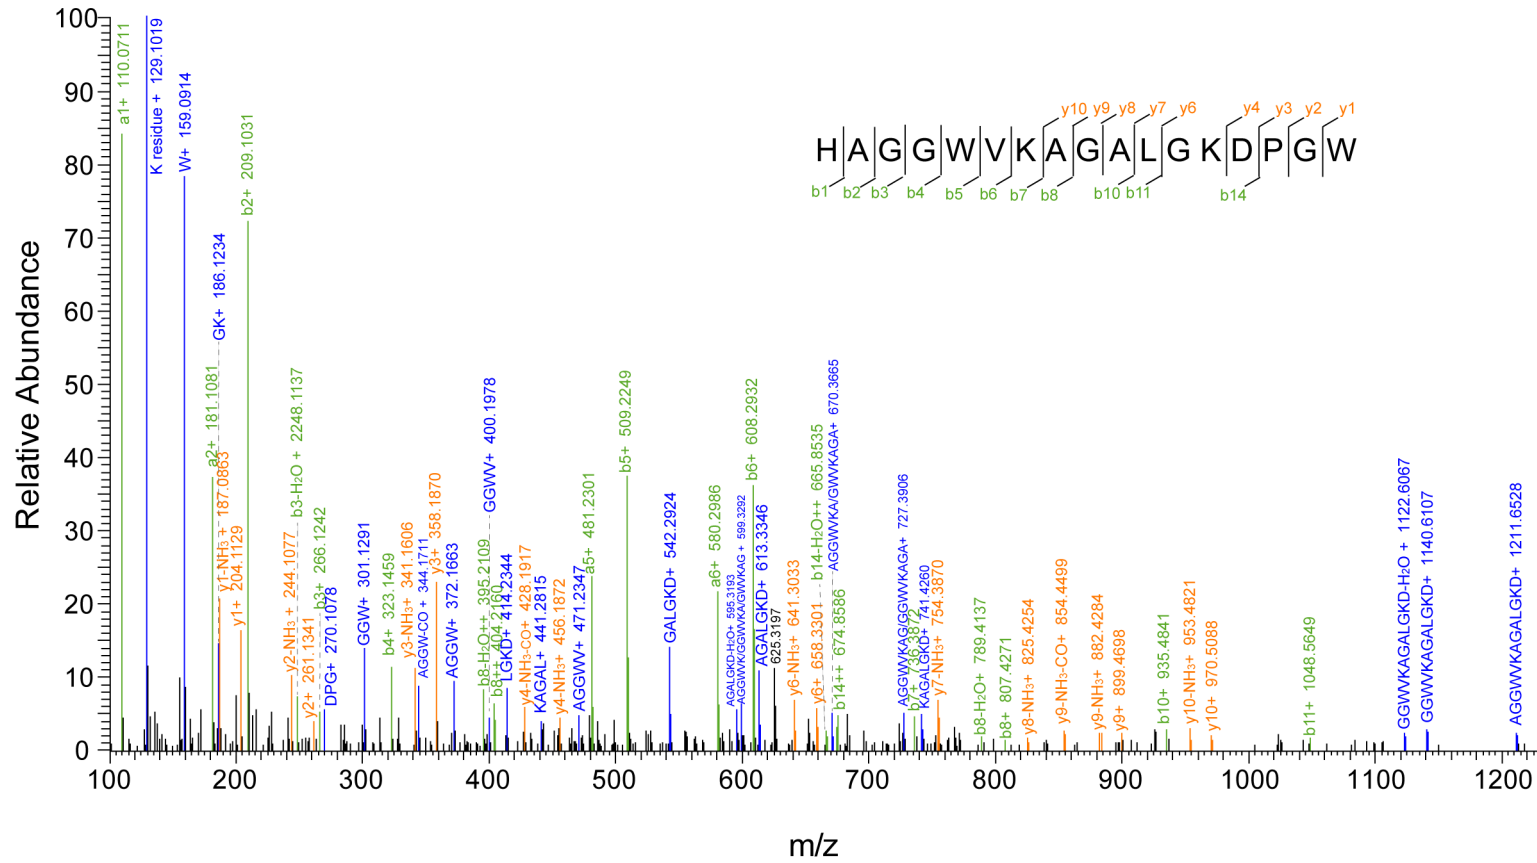

Figure S19. MS/MS spectrum of fla07, HAGGWVKAGALGKDPGW (C-term amidation).

SEQ: SCGHSGAGCYTRPCCPGLHCSGGQAGGLCV, Carb (C2) Carb (C9) Carb (C14) Carb (C15) Carb (C20) Carb (C29), Charge:3, MH+: 3180.2563, Score: 3.00e-021

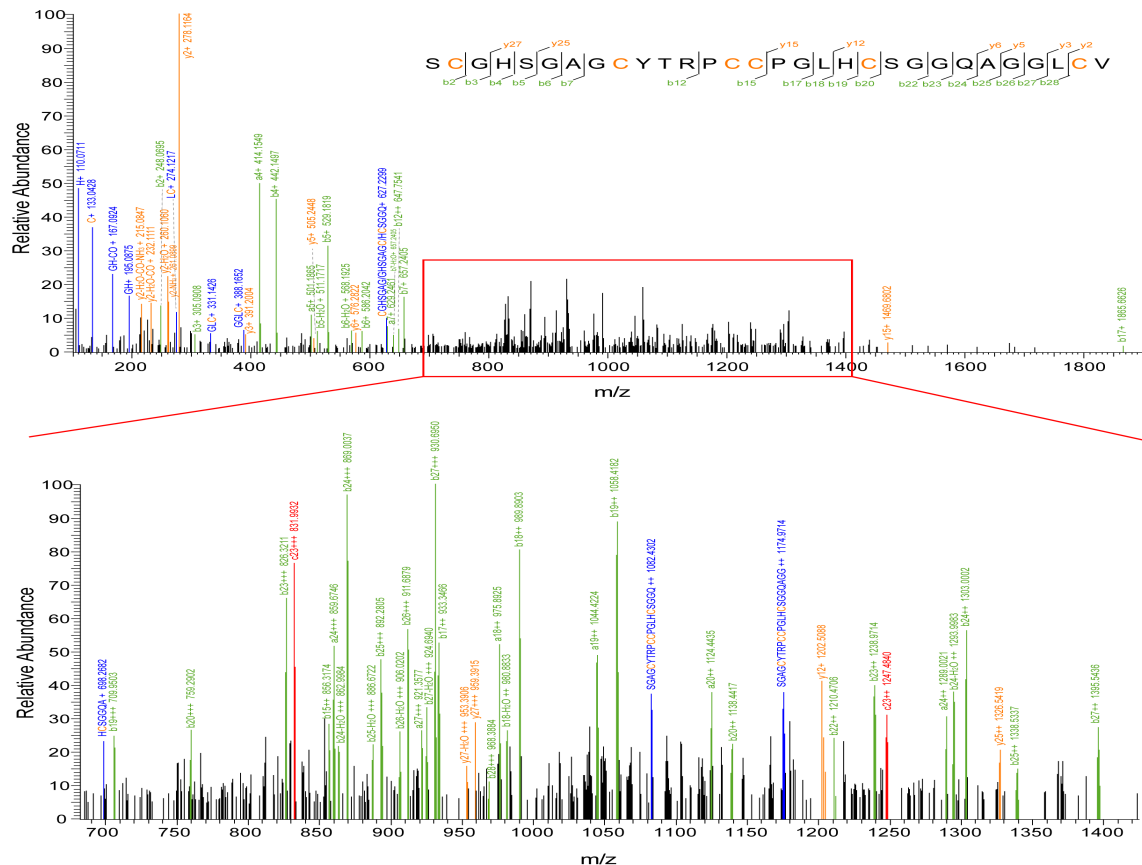

Figure S20. MS/MS spectrum of fla6a, SCGHSGAGCYTRPCCPGLHCSGGQAGGLCV. The c ion formation in CID experiment was previously reported by reference: Farrugia JM, O'Hair RAJ, Reid GE (2001). Do all b2 ions have oxazolone structures? Multistage mass spectrometry and ab initio studies on protonated N-acyl amino acid methyl ester model systems. *Int. J. Mass Spectrom.* 210, 71-87.



SEQ: SCGHSAGCYTRPCCPGLHCSGGQAGGLCV, Carb (C2) Carb (C9) Hydroxylation (P13) Carb (C14) Carb (C15) Carb (C20) Carb (C29), Charge:3, MH+: 3196.2557, Score: 6.22e-018

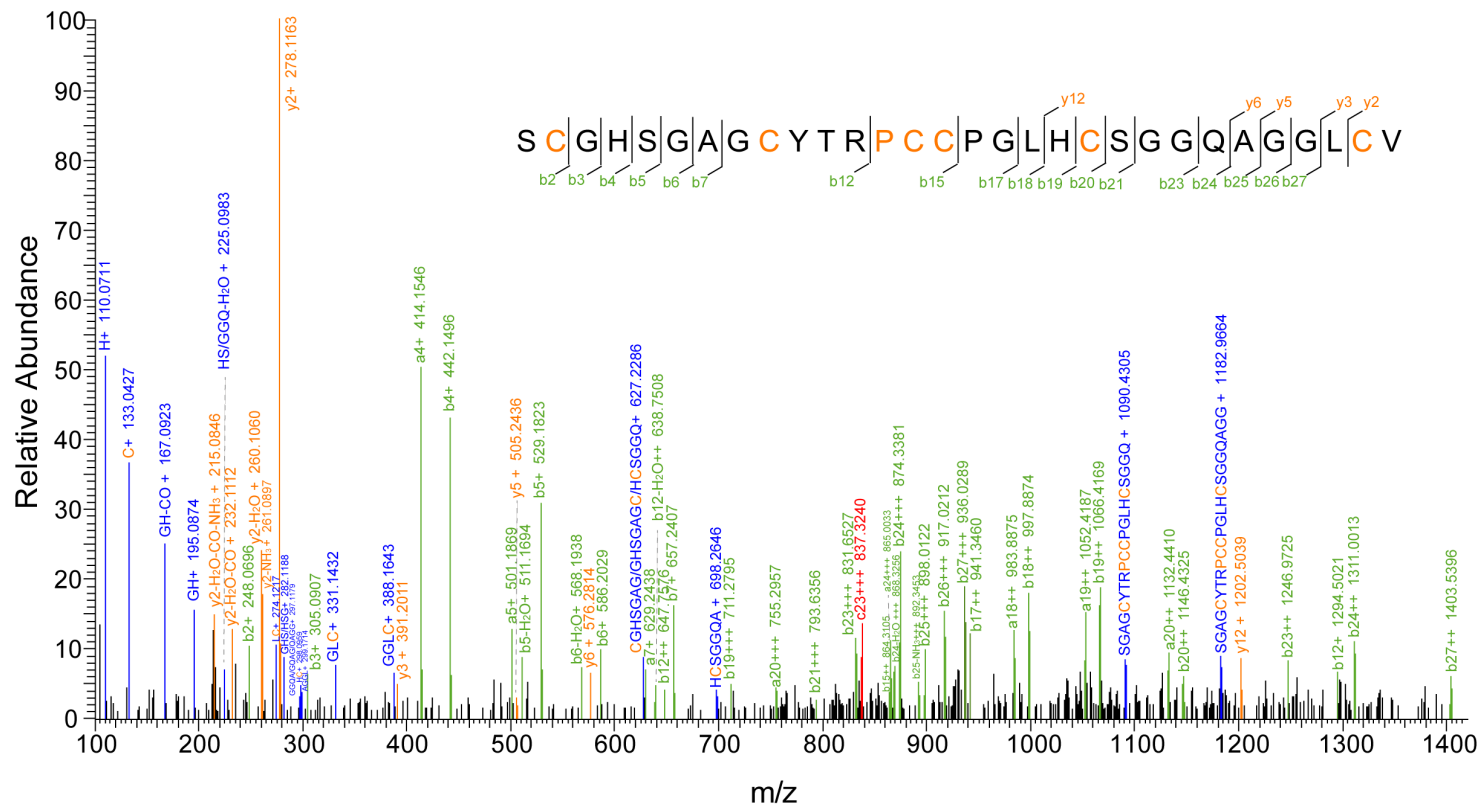

Figure S21. MS/MS spectrum of fla6b, SCGHSAGCYTRPCCPGLHCSGGQAGGLCV (Hydroxylation of P13). The c ion formation in CID experiment was previously reported by reference: Farrugia JM, O'Hair RAJ, Reid GE (2001). Do all b2 ions have oxazolone structures? Multistage mass spectrometry and ab initio studies on protonated N-acyl amino acid methyl ester model systems. *Int. J. Mass Spectrom.* 210, 71-87.

SEQ: SCGHSGAGCYTRPCCPGLHCSGGQAGGLCV, Carb (C2) Carb (C9) Hydroxylation (P13) Carb (C14) Carb (C15) Hydroxylation (P16) Carb (C20) Carb (C29), Charge:3, MH+: 3212.2467, Score: 5.08e-009

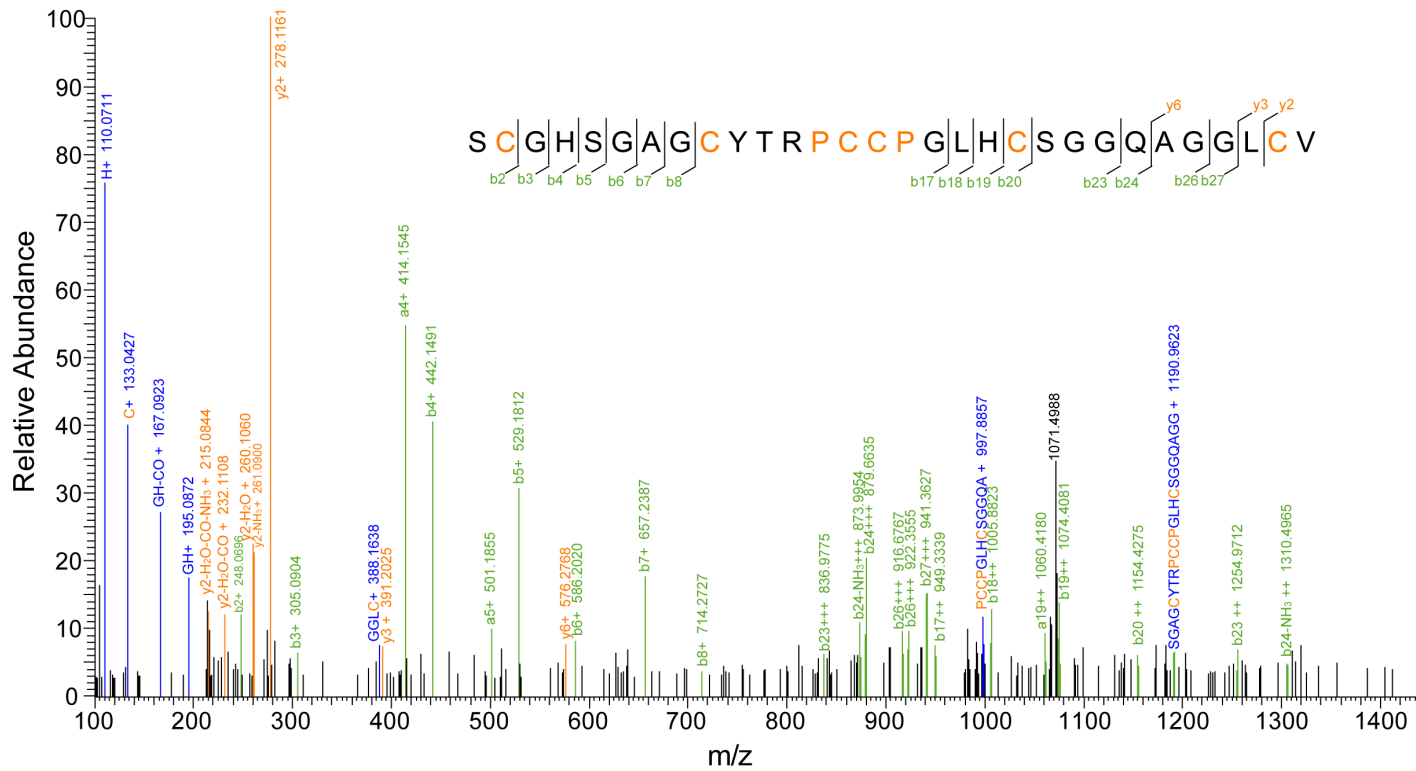

Figure S22. MS/MS spectrum of fla6c, SCGHSGAGCYTRPCCPGLHCSGGQAGGLCV (hydroxylation of P13 and P16).

SEQ: TCDPPGDSCSRWYNHCCSKLCTSRNSGPTCSR  
 Charge: 6, MH+: 3992.5991, Score: 6.49e-011

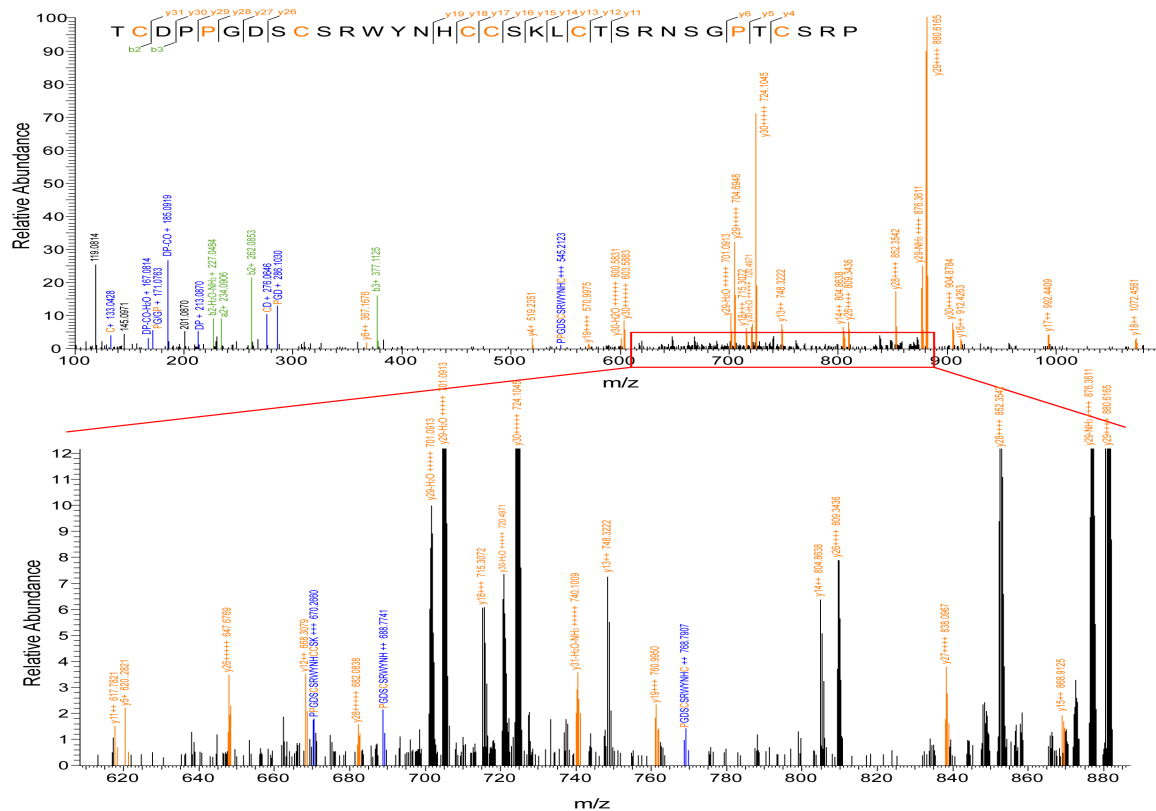

Figure S23. MS/MS spectrum of fla6d, TCDPPGDSCSRWYNHCCSKLCTSRNSGPTCSR (hydroxylation of P5 and P28), P marked in red indicates hydroxylated proline.

SEQ: ALCCYGYAFCCRL, Carb (C3) Carb (C4) Carb (C10) Carb (C11) Amidation (C-term), Charge:2, MH+: 1712.7104, Score: 1.24e-031

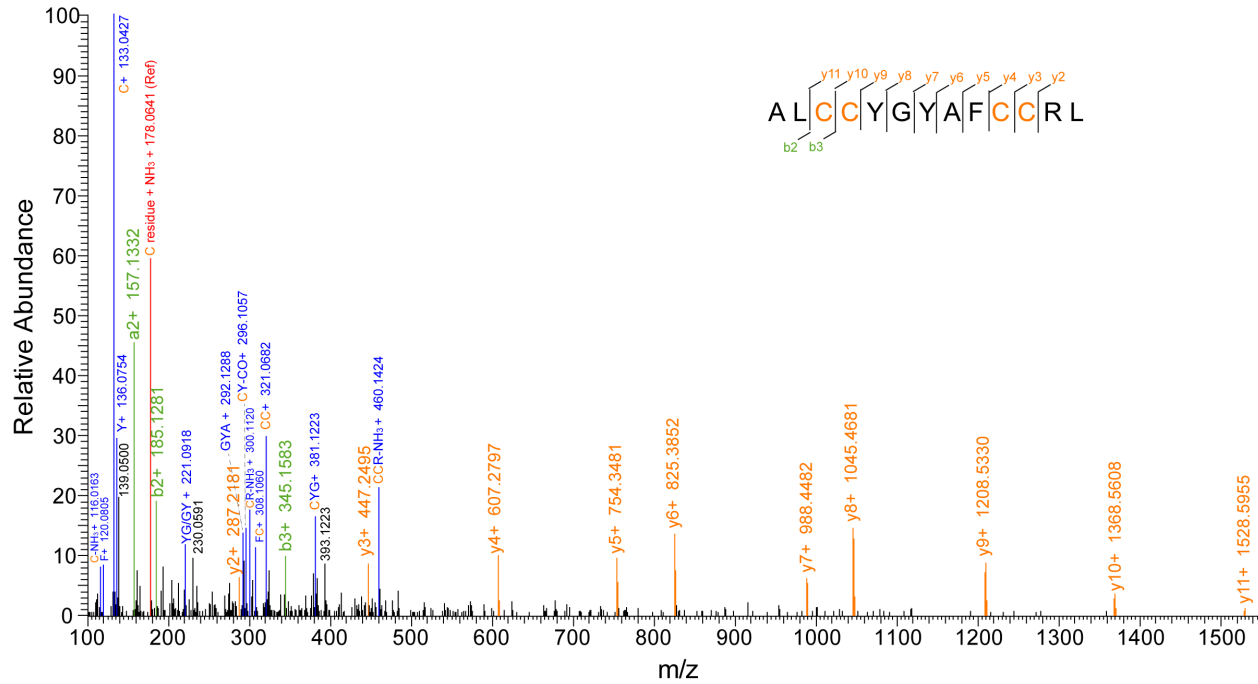

Figure S24. MS/MS spectrum of fla5a, ALCCYGYAFCCRL (C-term amidation). The red peak is speculated assignment to the breakdown of N-C $\alpha$  of cysteine residue, which was reported previously by reference: Asakawa D, Smargiasso N, Quinton L, De Pauw E. (2013) Peptide backbone fragmentation initiated by side-chain loss at cysteine residue in matrix-assisted laser desorption/ionization in-source decay mass spectrometry. *J Mass Spectrom.* 48(3): 352-360.

SEQ: LCCYGYAFCCRL, Carb (C2) Carb (C3) Carb (C9) Carb (C10) Amidation (C-term), Charge:2, MH+: 1641.6746, Score: 1.24e-030

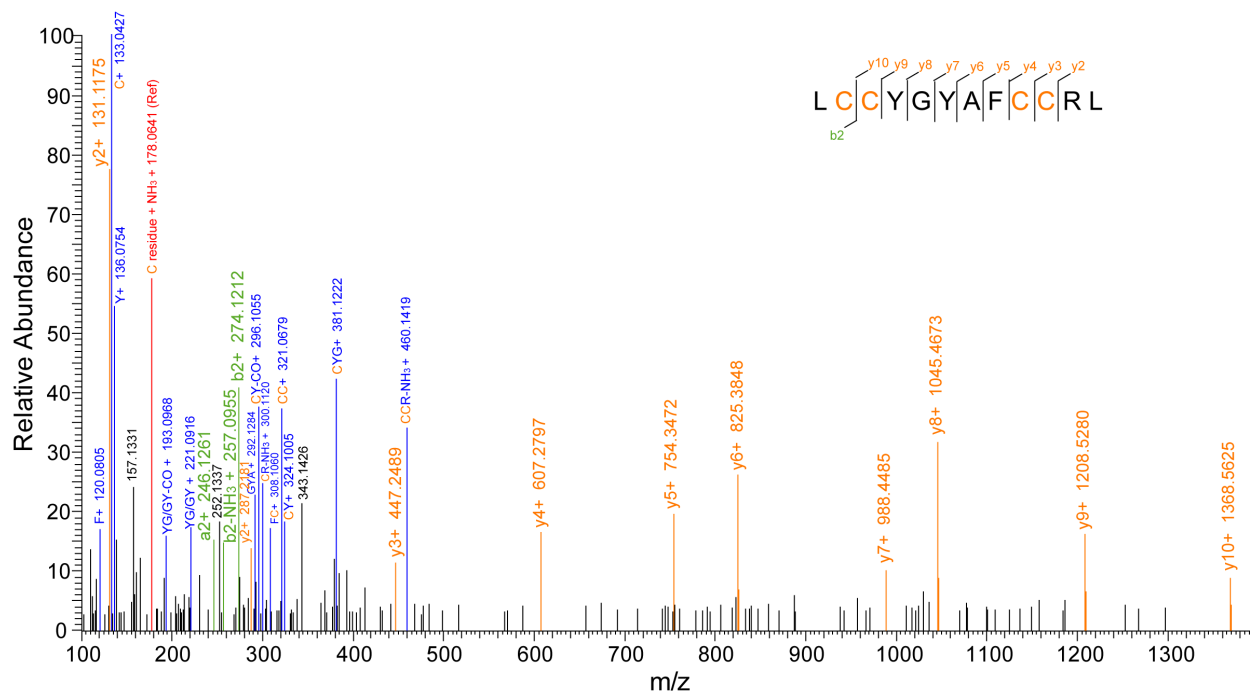

Figure S25. MS/MS spectrum of fla5b, LCCYGYAFCCRL (C-term amidation). The red peak is speculated assignment to the breakdown of N-C $\alpha$  of cysteine residue, which was reported previously by reference: Asakawa D, Smargiasso N, Quinton L, De Pauw E. (2013) Peptide backbone fragmentation initiated by side-chain loss at cysteine residue in matrix-assisted laser desorption/ionization in-source decay mass spectrometry. *J Mass Spectrom.* 48(3): 352-360.

SEQ: ALCCYGYRFCCPN, Carb (C3) Carb (C4) Carb (C10) Carb (C11), Charge:2, MH+: 1740.6666, Score: 1.71e-012

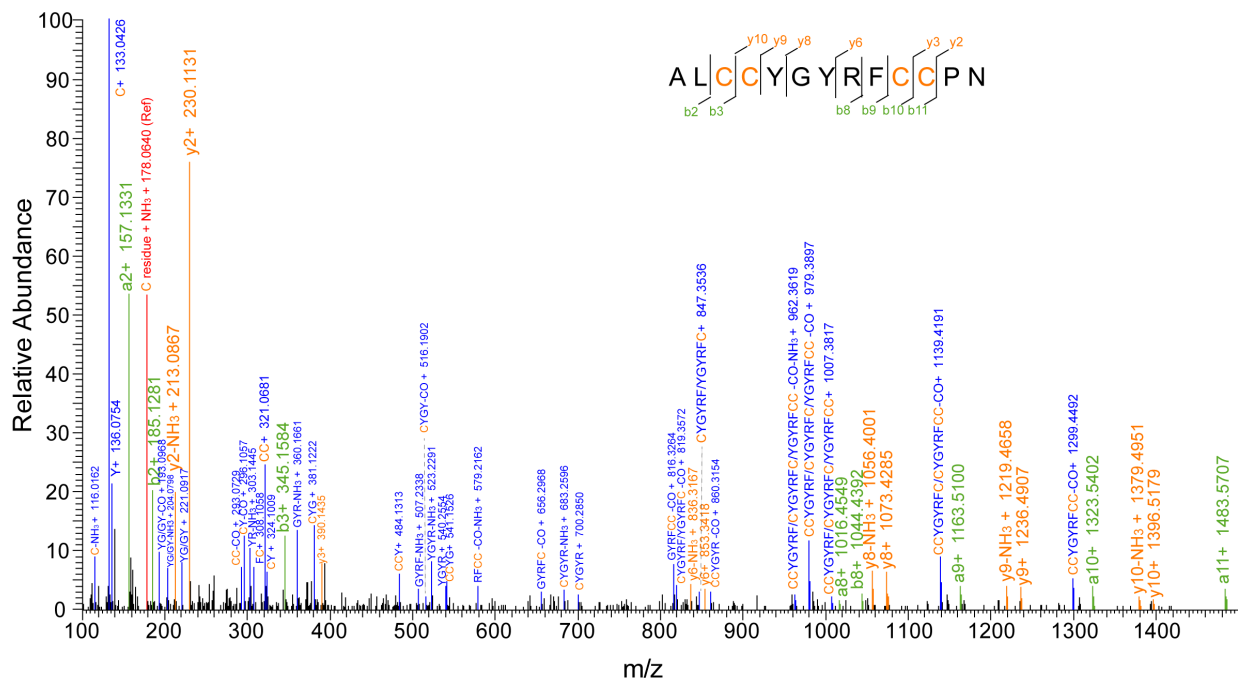

Figure S26. MS/MS spectrum of fla5d, ALCCYGYRFCCPN. The red peak is speculated assignment to the breakdown of N-C $\alpha$  of cysteine residue, which was reported previously by reference: Asakawa D, Smargiasso N, Quinton L, De Pauw E. (2013) Peptide backbone fragmentation initiated by side-chain loss at cysteine residue in matrix-assisted laser desorption/ionization in-source decay mass spectrometry. *J Mass Spectrom.* 48(3): 352-360.

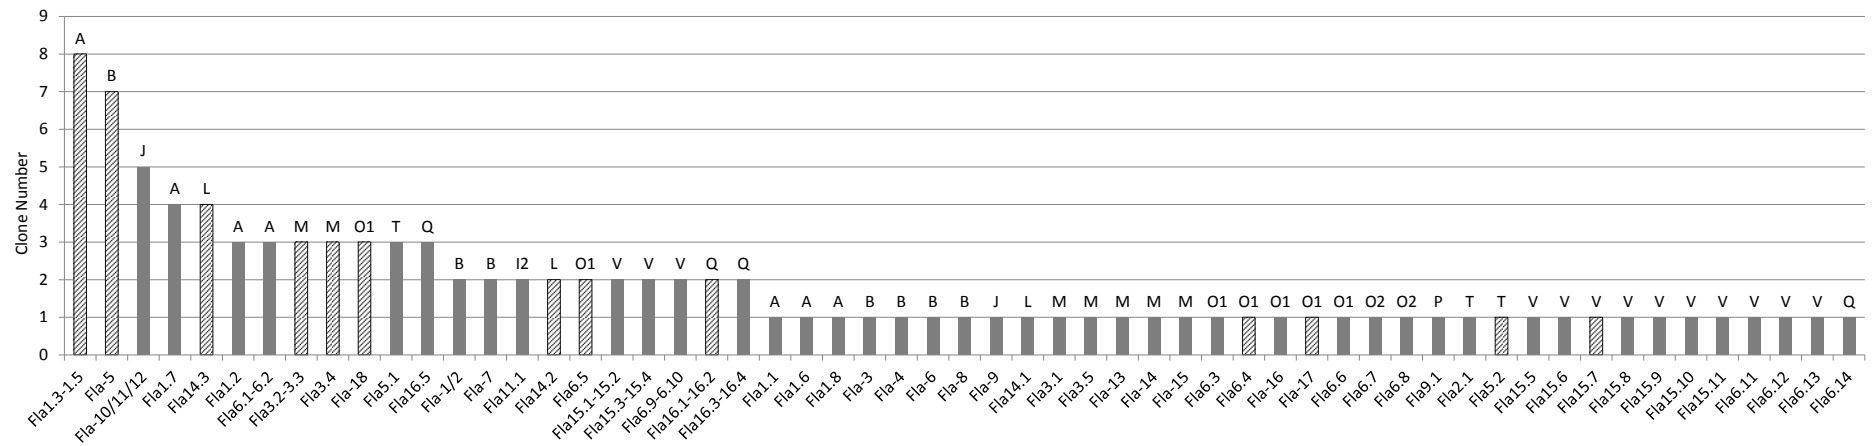

Figure S27. Clone numbers of 57 non-redundant mature peptides identified in the cDNA library of *C. flavidus*. The sequences with corresponding peptide components being identified in MS/MS analysis are shown in columns with meshy pattern.
