# Supplementary material
Source: PubMed Central journal article supplement (PMC3879607)
Supplement: supp_M113.028647_mcp.M113.028647-2.pdf [file supp_M113.028647_mcp.M113.028647-2.pdf]

**Table S1.** Conotoxins identified in *C. flavidus* cDNA library by BLAST searching against the NCBI nonredundant database using a cutoff of e-value of  $<10^{-6}$ . Underlined: predicted signaling sequence; bold underlined: predicted mature peptide region by ConoPrec on Conoserver. Mature peptides marked with “\*” were predicted empirically.

| Super-family | Name   | Accession number     | Prepropeptide Sequences                                                                                              | Predicted Mature Peptide Region   | Clones | Cysteine Framework | Best Matching GI Number | e-value  |
|--------------|--------|----------------------|----------------------------------------------------------------------------------------------------------------------|-----------------------------------|--------|--------------------|-------------------------|----------|
| A            | Fla1.1 | JX499074             | <u>MGMRMIFTVFLVLLVALATTVASFTLDRASNGRNAAADNKP</u><br><u>SDWIALAIK<b>QCCRNPKCSQQGCP</b></u>                            | <b><u>QCCRNPKCSQQGCP</u></b>      | 1      | I/II               | 74793917                | 7.00E-23 |
| A            | Fla1.2 | JX499075             | <u>MGMRMMFTMFVLVVLATTVVVSFPLDHASNGRDAAAYDK</u><br><u>ATPLIAR<b>DMECCSHPACQGINPDYCD</b></u>                           | <b><u>DMECCSHPACQGINPDYCD</u></b> | 3      | I/II               | 292630608               | 1.00E-17 |
| A            | Fla1.3 | JX499076             | <u>MGMRMMFTMLLLVVLATTVVVSFTLDHAFDGRNIAANNK</u><br><u>ATDLMALPVR<b>GCCSDPPCRHKHQDLCG</b></u>                          | <b><u>GCCSDPPCRHKHQDL</u></b>     | 1      | I/II               | 229485322               | 3.00E-21 |
| A            | Fla1.4 | JX499077             | <u>MGMRMMFTMLLLVVLATTVVVSFTLDHAFDGRNTAANNK</u><br><u>ATDLMALPVR<b>GCCSDPPCRHKHQDLCG</b></u>                          |                                   | 6      | I/II               | 229485322               | 3.00E-21 |
| A            | Fla1.5 | JX499099             | <u>MLLLVVLATTVVVSFTLDHAFDGRNTAANNKATDLMALPV</u><br><u>R<b>GCCSDPPCRHKHQDLCG</b></u>                                  |                                   | 1      | I/II               | 229485322               | 1.00E-16 |
| A            | Fla1.6 | JX499078             | <u>MGMRMMFTVFLVLLVALATTVASFTLDHASNGRNAAADDN</u><br><u>MSDWIAQALKR<b>CCGNPPCAHVNCRR</b></u>                           | <b><u>CCGNPPCAHVNCRR</u></b>      | 1      | I/II               | 74793917                | 1.00E-23 |
| A            | Fla1.7 | JX499079<br>JX499080 | <u>MGMRMMFTVFLVVLSTTVVSLPVDHASNGRDAAADSN</u><br><u>AADQIAQTAR<b>DPCCSNPSCAQTHPEICRR</b>MLQNPLNHD</u><br><u>MSPSA</u> | <b><u>DPCCSNPSCAQTHPEIC</u></b>   | 4      | I/II               | 46405121                | 6.00E-15 |

|   |        |                      |                                                                                                                                     |                                                                    |   |        |           |          |
|---|--------|----------------------|-------------------------------------------------------------------------------------------------------------------------------------|--------------------------------------------------------------------|---|--------|-----------|----------|
| A | Fla1.8 | JX499081             | <u>MGMRMMLTVFLLVVLATTVVSDHASDGRNTAAKVKYSK</u><br><u>TQECCPNPPCFAVNSALCGARR</u>                                                      | <u>NTAAKVKYSKTQE</u><br><u>ECCPNPPCFAVNSA</u><br><u>LCGA</u>       | 1 | I/II   | 229553924 | 1.00E-13 |
| A | Fla6.1 | JX499073             | <u>MGKRMVLTMFLLVVLATTVVSFTLDHASDSRGTAANDKA</u><br><u>TDQMALAVRLDWCDADFLVDHPELCGWDVCCAYPP</u><br><u>CRHKHQDCNQGR</u>                 | <u>LDWCDDADFLVD</u><br><u>HPELCGWDVCCAY</u><br><u>PPCRHKHQDCNQ</u> | 2 | VI/VII | 229485321 | 4.00E-14 |
| A | Fla6.2 | JX499135             | <u>MVLTMFLLVVLATTVVSFTLDHASDSRGTAANDKATDQ</u><br><u>MALAVRLDWCDADFLVDHPELCGWDVCCAYPPCRH</u><br><u>KHQDCNQGR</u>                     |                                                                    | 1 | VI/VII | 229485321 | 3.00E-12 |
| B | Fla-1  | JX499093             | <u>MLAHGDALTERRSADATALKPEPVLLQKSAARSTDDNDR</u><br><u>DRLTQRKRILKRGNTARGYEDHREIAETIRELQVP *</u>                                      | <u>GYEDHREIAETIRE</u><br><u>LQVP *</u>                             | 1 | C0     | 212288186 | 1.00E-23 |
| B | Fla-2  | JX499106             | <u>MQLYTHLYLLVPLVAFHLILGTGMLAHGDALTERRSADA</u><br><u>TALKPEPVLLQKSAARSTDDNDRDRLTQRKRILKRGNT</u><br><u>ARGYEDHREIAETIRELQVP *</u>    |                                                                    | 1 | C0     | 326416228 | 4.00E-36 |
| B | Fla-3  | JX499094             | <u>MLAHGDALTERRSADATALKPEPVLLQKSAARSTDDNDR</u><br><u>DRLTQRKRILKRGNTARGYEEDWEIWENIRKLEAGK *</u>                                     | <u>GYEEDWEIWENIR</u><br><u>KLEAGK *</u>                            | 1 | C0     | 212288186 | 6.00E-22 |
| B | Fla-4  | JX499105             | <u>MQLYTHLYLLVPLVAFHLILGTGMLAHGDALTERRSADA</u><br><u>TALKPEPVLLQKSAARSTDDNDRDRLTQRKRILKRGNT</u><br><u>ARGNEDHRETAETIRELQVP *</u>    | <u>GNEDHRETAETIR</u><br><u>ELQVP *</u>                             | 1 | C0     | 326416228 | 1.00E-36 |
| B | Fla-5  | JX499108<br>JX499109 | <u>MQLYTHLYLLVPLVAFHLILGTGTLAHGDALTERRSADAT</u><br><u>ALKPEPVLLQKSAARSTDDNDRDRLTQRKRILKKQGNMA</u><br><u>RGYEEDREIAETIRELNEAGK *</u> | <u>GYEEDREIAETIRE</u><br><u>LNEAGK *</u>                           | 7 | C0     | 326416228 | 2.00E-36 |
| B | Fla-6  | JX499107             | <u>MQLYTHLYLLVPLVAFHLILGTGMLAHGDALTERRSADA</u><br><u>TALKPEPVLLQKSAARSTDDNDRDRLTQRKRILKRGNT</u><br><u>ARGYEEDWEYWETIRKLTEAGK *</u>  | <u>GYEEDWEYWETIR</u><br><u>KLTEAGK *</u>                           | 1 | C0     | 212288190 | 2.00E-35 |

|    |         |          |                                                                                                                             |                                                                  |   |     |           |          |
|----|---------|----------|-----------------------------------------------------------------------------------------------------------------------------|------------------------------------------------------------------|---|-----|-----------|----------|
| B  | Fla-7   | JX499110 | <u>MQSFTCMCLLVPLLFHLTQRSDTAGHGGAATDVRSDH</u><br><u>VLKRFYHDFRRAPKRRSNDRYNRRQSTSLSLEILAEQT</u><br><u>RERSREASVEHLREIGR *</u> | <u>SREASVEHLREIGR</u><br><u>*</u>                                | 2 | C0  | 326422284 | 3.00E-29 |
| B  | Fla-8   | JX499111 | <u>MQSFTCMCLLVPLLFHLTQRSDTAGHGGAATDVRSDH</u><br><u>TLKRFHHDFFRRAPKRRSNDRYNRRRSSTWTARLEIVFEDI</u><br><u>RREKAEDSREASV *</u>  | <u>REKAEDSREASV *</u>                                            | 1 | C0  | 326422284 | 4.00E-25 |
| I2 | Fla11.1 | JX499100 | <u>MMFRLASVGCFLLVIGFLDLVRLNVVLTCDTEEGDYCA</u><br><u>YDFECCFLNCCYGMCMGVCSGRKRAHLHELLRHR</u>                                  | <u>NVVLTYDCTEED</u><br><u>YCAFDCECCFLNCC</u><br><u>YGMCMGVCS</u> | 2 | XI  | 290463144 | 4.00E-10 |
| J  | Fla-9   | JX499131 | <u>MTSVQSVTCGCLLWLLSVQLVTPGSPATAQLSRHRTSR</u><br><u>WTTEEFMEKVCFPHCAPGRPAHTGRDVAPSWIRRRKR</u><br><u>AMAV</u>                | <u>WTTEEFMEKVCFP</u><br><u>HCAPGRPAHTGRD</u><br><u>VAPSWI</u>    | 1 | C2  | 117940164 | 1.00E-09 |
| J  | Fla-10  | JX499132 | <u>MTSVQSVTCGCLLWLLSVQLVTPGSPATAQLSRHRTSR</u><br><u>WTTEEFMEKVCFPYCAPGRPAHTGRDVAPSWIRRRKR</u><br><u>AMAV</u>                |                                                                  | 3 | C2  | 326454636 | 1.00E-09 |
| J  | Fla-11  | JX499133 | <u>MTSVQSVTCGCLLWLLSVQLVTPGSPATAQLSRHRTYR</u><br><u>WTTEEFMEKVCFPYCAPGRPAHTGRDVAPSWIRRRKR</u><br><u>AMAV</u>                | <u>WTTEEFMEKVCFP</u><br><u>YCAPGRPAHTGRD</u><br><u>VAPSWI</u>    | 1 | C2  | 326454636 | 2.00E-09 |
| J  | Fla-12  | JX499134 | <u>MTSVQSVTCGCLLWLLSVQLVTPGSPATVQLSRHRTSR</u><br><u>WTTEEFMEKVCFPYCAPGRPAHTGRDVAPSWIRRRKR</u><br><u>AMAV</u>                |                                                                  | 1 | C2  | 326454636 | 3.00E-09 |
| L  | Fla14.1 | JX499085 | <u>MKLSVTFIVVLMMLTSLTFGFSLSNNGERAYGPRHSNVA</u><br><u>DQLVPREQASRTCYPFCIGYTYCKSGTCEYRLGRASTVF</u><br><u>LKRQ</u>             | <u>TCYPPCIGYTYCKS</u><br><u>GTCEYRLGRASTV</u><br><u>FL</u>       | 1 | XIV | 326422276 | 2.00E-18 |
| L  | Fla14.2 | JX499086 | <u>MKLSVTFIVVLMMLTSLTFGFSLSNNGERAYGPRHSNVA</u><br><u>DQLVPREQASRTCYPFCIGYTYCKSGTCEYRQGRASTVF</u><br><u>LKRQ</u>             | <u>TCYPPCIGYTYCKS</u><br><u>GTCEYRQGRASTV</u><br><u>FL</u>       | 2 | XIV | 326422276 | 2.00E-18 |

|    |         |          |                                                                                                           |                                                            |   |        |           |          |
|----|---------|----------|-----------------------------------------------------------------------------------------------------------|------------------------------------------------------------|---|--------|-----------|----------|
| L  | Fla14.3 | JX499087 | <u>MKLSVTFIVVLMMLTTSFTFGFSLSSNNGERAYGSHHSYVA</u><br><u>DQLVRRERASRACNPPCSDILTCLHGTCKHLGIG</u>             | <u>ASRACNPPCSDILT</u><br><u>CLHGTCKHLGI</u>                | 4 | XIV    | 326422276 | 1.00E-17 |
| M  | Fla3.1  | JX499096 | <u>MLKMGVVLFTFLVLFPLATLQLNADQHVARYAENKQNFN</u><br><u>PNERMKMMLSALRQRCCISPACHKDCYCCL</u>                   | <u>RCCISPACHKDCYC</u><br><u>CL</u>                         | 1 | III    | 74836928  | 6.00E-28 |
| M  | Fla3.2  | JX499097 | <u>MLKMRVVLFTFLVLFPLATLQLDADQPRARYAENKQDFN</u><br><u>RNERTKMILSAVSASMGRQRRCLWPECGGCVCY</u>                | <u>CCLWPECGGCVC</u><br><u>Y</u>                            | 2 | III    | 74836928  | 1.00E-19 |
| M  | Fla3.3  | JX499098 | <u>MLKMRVVLFTFRVLFPLATLQLDADQPRARYAENKQDFN</u><br><u>RNERTKMILSAVSASMGRQRRCLWPECGGCVCY</u>                |                                                            | 1 | III    | 74836928  | 5.00E-19 |
| M  | Fla3.4  | JX499103 | <u>MMSKLGVLLTISLLLPLTAVQLDGEQPVDLLALRTQDFA</u><br><u>PEQSPWFDPVKRCCSKYCWECTPCCPYSSG</u>                   | <u>CCSKYCWECTPCC</u><br><u>PYSS</u>                        | 3 | III    | 326635518 | 2.00E-24 |
| M  | Fla3.5  | JX499104 | <u>MMSKLGVLLTVCLLLFPLTALRLVRDQPAERPAKRTQDDI</u><br><u>PNGQDPLIDRQINCCPWPCPDSCHYQCCH</u>                   | <u>QINCCPWPCPDS</u><br><u>HYQCCH</u>                       | 1 | III    | 110278928 | 1.00E-13 |
| M  | Fla-13  | JX499101 | <u>MMSKLGVLLTICLLLFPLTAVPLDGDQPVDLPALRTQDFA</u><br><u>SEHSPGFDPVKRQFICVQDIFCAVRGTV</u>                    | <u>QFICVQDIFCAVRG</u><br><u>TV</u>                         | 1 | C2     | 74848622  | 7.00E-18 |
| M  | Fla-14  | JX499102 | <u>MMSKLGVLLTICLLLFPLTAVQLDGEQPVDLLALRTQDFA</u><br><u>PEQSPWFDPVKRGCSMYCWKCFPCCPNG</u>                    | <u>GCSMYCWKCFPCC</u><br><u>PN</u>                          | 1 | C5     | 326635518 | 1.00E-24 |
| M  | Fla-15  | JX499095 | <u>MLKMGVMLFTFLVLFHLAAPQLDADQPARYAGNKPDF</u><br><u>NPNKRMKMMSALRKRGCCPPSLCDPGCDEGCPPVVTPA</u><br><u>C</u> | <u>GCCPPSLCDPGCDE</u><br><u>GCPPVVTPAC</u>                 | 1 | C7     | 74836925  | 2.00E-20 |
| O1 | Fla6.3  | JX499083 | <u>MKLKMCVLIHVLFTASQLITADYSRDKQEYRAERLRDAM</u><br><u>GKFKGSRSCGHSGAGCYSRPCCPGLHCSGTHAGGMCV</u>            | <u>SCGHSGAGCYSRP</u><br><u>CPGLHCSGTHAGG</u><br><u>MCV</u> | 1 | VI/VII | 122011896 | 1.00E-34 |

|    |        |          |                                                                                                                           |                                                                                     |   |        |           |          |
|----|--------|----------|---------------------------------------------------------------------------------------------------------------------------|-------------------------------------------------------------------------------------|---|--------|-----------|----------|
| 01 | Fla6.4 | JX499084 | <u>MKLMCVLIIVLFLTASQLITADYSRDKQEYRAERLRDAM</u><br><u>GKFKGSRSCGHSGAGCYTRPCCPGLHCSGGQAGGLCV</u>                            | <u>SCGHSGAGCYTRP</u><br><u>CCPGLHCSGGQAG</u><br><u>GLCV</u>                         | 1 | VI/VII | 122011896 | 4.00E-35 |
| 01 | Fla6.5 | JX499088 | <u>MKLTCALIVAMLFLTACQLTTTDDSRGRQKYPTELRVK</u><br><u>MRNPKLSKLTKTCDPPGDSCSRWYNHCCSKLCTSRNS</u><br><u>GPTCSR</u>            | <u>MRNPKLSKLTKTC</u><br><u>DPPGDSCSRWYNH</u><br><u>CCSKLCTSRNSGPT</u><br><u>CSR</u> | 2 | VI/VII | 122011877 | 7.00E-41 |
| 01 | Fla-16 | JX499089 | <u>MKLTCILIVAVLFSTAWTFVTVDSDINHLKYREWTFKP</u><br><u>WGKRIPEARDKMKNLKFSLDNKKRRL †</u>                                      | <u>EWTFKPKWGKRI</u><br><u>P †</u>                                                   | 1 | C0     | 85717919  | 1.00E-09 |
| 01 | Fla-17 | JX499090 | <u>MKLTCILIVAVLFSTAWTFVTVDSDINHLKYREWTFRP</u><br><u>WGKRIPEARDKMKNLKFSLDNKKRRL †</u>                                      | <u>EWTFRPWGKRI</u><br><u>P †</u>                                                    | 1 | C0     | 85717919  | 2.00E-09 |
| 01 | Fla-18 | JX499091 | <u>MKLTCVMIVAALFLTAWTFVTADNSKYELENRGGLGHA</u><br><u>GGWVKAGALGKDPGWGKRFLMARDEMKNPKASKLVP</u><br><u>†</u>                  | <u>GGLGHAGGWVKA</u><br><u>GALGKDPGWGKR</u><br><u>FL †</u>                           | 3 | C0     | 85717919  | 3.00E-10 |
| 01 | Fla6.6 | JX499092 | <u>MKLTCVMIVALLFLTAWAFVTADDLINKLENRGGWAQA</u><br><u>RGWGKPFAMARDEASKLDNEKRCYDVGDFCGIPFIKNG</u><br><u>NCCSQFCVFCVCTPEW</u> | <u>CYDVGDFCGIPFIK</u><br><u>NGNCCSQFCVFCVCT</u><br><u>PEW</u>                       | 1 | VI/VII | 74848541  | 8.00E-18 |
| 02 | Fla6.7 | JX499071 | <u>MEKLTSLLLVAALLMLTQTLIQGGGEDRPNNKFLQKIKST</u><br><u>AKRDCTPPSSYCDYPEECCEVECGRHYCDWW</u>                                 | <u>DCTPPSSYCDYPEE</u><br><u>CCEVECGRHYCDW</u><br><u>W</u>                           | 1 | VI/VII | 122011888 | 1.00E-24 |
| 02 | Fla6.8 | JX499072 | <u>MEKLTSLLLVAALLMLTQTLIQGGREGRPKKFLQKIKSTA</u><br><u>KRECTAPSGYCDYPEECCEVECGRHYCDWWY</u>                                 | <u>ECTAPSGYCDYPEE</u><br><u>CCEVECGRHYCDW</u><br><u>WY</u>                          | 1 | VI/VII | 122011888 | 6.00E-23 |
| P  | Fla9.1 | JX499082 | <u>MHLSLAGSAVLMLLLLFALGNFVGVQTGQIARDVDNGLLT</u><br><u>DKHRDLQSLRKPMDFFKSLYKRSSCGEDCWGDADCPND</u><br><u>CPYCVSNLSKCM</u>   | <u>SSCGEDCWGDADC</u><br><u>PNDPCYCVSNLSKC</u><br><u>M</u>                           | 1 | IX     | 22001566  | 9.00E-12 |

|   |         |          |                                                                                                               |                                               |   |      |           |          |
|---|---------|----------|---------------------------------------------------------------------------------------------------------------|-----------------------------------------------|---|------|-----------|----------|
| T | Fla2.1  | JX499114 | <u>MRCVPVFIILLLLSPSAPSVDAYPKTKDDVPLASFHDDAKR</u><br><u>TLQRLWIKGFCCNGYACWCSNFR</u>                            | <u>GFCCNGYACWCSN</u><br><u>F</u>              | 1 | I/II | 122011898 | 6.00E-24 |
| T | Fla5.1  | JX499112 | <u>MRCVPVFIILLLLSPSAPSVD AHPKTKDDVPLASFHDDAK</u><br><u>QTLQRLWIKGSCCYESKPYCCHF</u>                            | <u>GSCCYESKPYCCHF</u>                         | 3 | V    | 122011898 | 3.00E-22 |
| T | Fla5.2  | JX499113 | <u>MRCVPVFIILLLLSPSAPSVD AHPKTKDDVPLASFHDDAK</u><br><u>RTLQRLWIKALCCYGYAFCCRLGR</u>                           | <u>ALCCYGYAFCCRL</u>                          | 1 | V    | 122011903 | 2.00E-26 |
| V | Fla15.1 | JX499116 | <u>MSTPKMTPFILLLLFSLMIRCGDGKAIQEDRDPSTRLLTGD</u><br><u>KNRDLSVNRRCFTCNGEKCCGDCLCSWDKDDCFCVLNG</u><br><u>K</u> | <u>CFTCNGEKCCGDCL</u><br><u>CSWDKDDCFCVLN</u> | 1 | XV   | 290463196 | 2.00E-14 |
| V | Fla15.2 | JX499120 | <u>MSTPKMTPFILLLLFSLTIRCGDGKAIQEDRDPSTRLLTGD</u><br><u>KNRDLSVNRRCFTCNGEKCCGDCLCSWDKDDCFCVLNG</u><br><u>K</u> | <u>CFTCNGEKCCGDCL</u><br><u>CSWDKDDCFCVLN</u> | 1 | XV   | 290463196 | 2.00E-14 |
| V | Fla15.3 | JX499117 | <u>MSTPKMTPFILLLLFSLTIRCGDGKAIQEDRDPSTRLLTGD</u><br><u>KNRDLSVNRRCFNCNGEICCGDCFCCTSDKQYCFRQFRK</u>            | <u>CFNCNGEICCGDCF</u><br><u>CTSDKQYCFRQF</u>  | 1 | XV   | 290463196 | 2.00E-11 |
| V | Fla15.4 | JX499118 | <u>MSTPKMTPFILLLLFSLTIRCGDGKAIQEDRDPSTRLLTGD</u><br><u>KNRDLSVNRRCFNCNGEICCGDCFCCTSDKQYCFRQFRK</u>            | <u>CFNCNGEICCGDCF</u><br><u>CTSDKQYCFRQF</u>  | 1 | XV   | 290463196 | 2.00E-11 |
| V | Fla15.5 | JX499119 | <u>MSTPKMTPFILLLLFSLTIRCGDGKAIQEDRDPSTRLLTGD</u><br><u>KNRDLSVNRRCFNCNGEICCGDCFCCTSDRQYCFRQFRK</u>            | <u>CFNCNGEICCGDCF</u><br><u>CTSDRQYCFRQF</u>  | 1 | XV   | 290463196 | 2.00E-11 |
| V | Fla15.6 | JX499121 | <u>MSTPKMTPFILLLLFSLTIRCGDGKAIQEDRDPSTRLLTGD</u><br><u>KNRDLSVNRRCFTCNGEKCCGDCLCSWYKDDCFCVLNG</u><br><u>K</u> | <u>CFTCNGEKCCGDCL</u><br><u>CSWYKDDCFCVLN</u> | 1 | XV   | 290463196 | 1.00E-14 |
| V | Fla15.7 | JX499122 | <u>MSTPKMTPFILLLLFSLTIRCGDGKAIQEDRDPSTRLLTGD</u><br><u>KNRDLSVNRRCSSCNGEICCGSCFCFPHGKNCFCRQLGK</u>            | <u>CSSCNGEICCGSCFC</u><br><u>FPHGKNCFCRQL</u> | 1 | XV   | 290463196 | 1.00E-14 |

|   |          |          |                                                                                                        |                                                                                       |   |        |           |          |
|---|----------|----------|--------------------------------------------------------------------------------------------------------|---------------------------------------------------------------------------------------|---|--------|-----------|----------|
| V | Fla15.8  | JX499127 | <u>MSTPRMTPFILLLLFSLTIRCGDGKAIQEDRDPSARLLTGD</u><br><u>KNHDLVSKDDCNICGGEECCGRCTCAFGNCSCIAW</u> GK      | <u>DDCNICGGEECCGR</u><br><u>CTCAFGNCSCIAW</u>                                         | 1 | XV     | 290463196 | 8.00E-20 |
| V | Fla15.9  | JX499128 | <u>MSTPRMTPFILLLLFSLTIRCGDGKAIQGDRDPSASLLTGD</u><br><u>KNHDLVQIDCGTCDGEECCGVCICSFGNCSCTPW</u> GK       | <u>DPSASLLTGDKNH</u><br><u>DLSVQIDCGTCDGE</u><br><u>ECCGVCICSFGNCS</u><br><u>CTPW</u> | 1 | XV     | 290463196 | 9.00E-19 |
| V | Fla15.10 | JX499129 | <u>MSTPRMTPFILLLLFSLTIRCGDGKVIQEDRDPSRLLMGD</u><br><u>KKPCRPCAGIQCCGRICFFYECGCEPW</u> GK               | <u>PCRPCAGIQCCGRIC</u><br><u>ICFFYECGCEPW</u>                                         | 1 | XV     | 290463196 | 5.00E-08 |
| V | Fla15.11 | JX499130 | <u>MSTPRMTPFILLLLFSLTIRCGDGKVIQEDRDPSRLLMGD</u><br><u>KKPCRPCDGIQCCGRICFFYECGCEPW</u> GK               | <u>PCRPCDGIQCCGRIC</u><br><u>ICFFYECGCEPW</u>                                         | 1 | XV     | 290463196 | 3.00E-07 |
| V | Fla6.9   | JX499123 | <u>MSTPRMMPFILLLLFSLTIRCGDGKAIQGDRDPSASLLKGD</u><br><u>KSRDLLVKGCSICNGGQCCGLCLYSRIISRYMCLPVA</u> K     | <u>GCSICNGGQCCGLC</u><br><u>LYSRIISRYMCLPV</u>                                        | 1 | VI/VII | 290463196 | 2.00E-12 |
| V | Fla6.10  | JX499125 | <u>MSTPRMMPFILLLLFSLTIRCGDGKAIQGDRDPSASLLTGD</u><br><u>KSRDLLVKGCSICNGGQCCGLCLYSRIISRYMCLPVA</u> K     | <u>A</u>                                                                              | 1 | VI/VII | 290463196 | 4.00E-13 |
| V | Fla6.11  | JX499124 | <u>MSTPRMMPFILLLLFSLTIRCGDGKAIQGDRDPSASLLTGD</u><br><u>KSRDLLVKGCSICNGGQCCGLCLFSRIISRYMCLPVA</u> K     | <u>GCSICNGGQCCGLC</u><br><u>LFSRIISRYMCLPV</u><br><u>A</u>                            | 1 | VI/VII | 290463196 | 4.00E-13 |
| V | Fla6.12  | JX499126 | <u>MSTPRMTPFILLLLFSLIFRCGDGKAIQGDRDPSASLLTGD</u><br><u>KSRDLLVKTDCYNCDGEECCGRCLYSWPLQMFTCVTVE</u><br>K | <u>TDCYNCDGEECCGR</u><br><u>RCLYSWPLQMFTC</u><br><u>VTVE</u>                          | 1 | VI/VII | 290463196 | 3.00E-14 |
| V | Fla6.13  | JX499115 | <u>MSTARMTPFILLLLFSLTIRCGDGKAIQGDRDPSASLLTGH</u><br><u>KSRDLSVKTDCFYCNGVYCCHWCIYSAAEERLNCVNPW</u><br>K | <u>TDCFYCNGVYCCH</u><br><u>WCIYSAAEERLNC</u><br><u>VNPW</u>                           | 1 | VI/VII | 290463196 | 3.00E-10 |

|   |         |  |                                                                                                                            |                                                               |   |        |   |   |
|---|---------|--|----------------------------------------------------------------------------------------------------------------------------|---------------------------------------------------------------|---|--------|---|---|
| Q | Fla16.1 |  | <u>MHTLEMLLLLLLLLPLALGEGDGQAVAGDRNPSEARSTH</u><br><u>EHFLQRLIRLIHGSDCQPCGQYVCCPPWKYAEYRRFT</u>                             | <u>LIHGSDCQPCGQYV</u><br><u>CCPPWKYAEY</u>                    | 1 | XVI    | - | - |
| Q | Fla16.2 |  | <u>MHTLEMLLLLLLLLPLAPGEGDGQAVAGDRNPSEARSTH</u><br><u>EHFLQRLIRLIHGSDCQPCGQYVCCPPWKYAEYRRFT</u>                             |                                                               | 1 | XVI    | - | - |
| Q | Fla16.3 |  | <u>MHTLEMLLLLLLLLPLAPGEGDGQAVARDRNPSEARSTH</u><br><u>EHFLQRLIRLIDGRDCKLCGHDVCCDWA</u>                                      | <u>DCKLCGHDVCCD</u><br><u>WA</u>                              | 1 | XVI    | - | - |
| Q | Fla16.5 |  | <u>MLLLLLLLLLPLAPGEGDGQAVAGDRNPSEARSTHEHFLQR</u><br><u>LIRLIDGRDCKLCGHDVCCDWA</u>                                          |                                                               | 1 | XVI    | - | - |
| Q | Fla16.4 |  | <u>MHTLEMLLLLLLLLSPLALGEGDGQAVAGDRNPSEARSTH</u><br><u>EHFLQRLLGRIDGRDCQPCGHDVCCPP</u>                                      | <u>DCQPCGHDVCCPP</u>                                          | 3 | XVI    | - | - |
| Q | Fla6.14 |  | <u>MHTLEMLLLLLLLLPLAPGEGDGQAVAGDRNPGEARSTH</u><br><u>KRFLQRPARRIHRHRC</u> <u>TPCGPDLCCPEGTTCDRVLHHT</u><br><u>HFGEPCSY</u> | <u>CTPCGPDLCCEPGT</u><br><u>TCDRVLHHTHFGE</u><br><u>PSCSY</u> | 1 | VI/VII | - | - |
